# Supplementary material for: Multifunctional switching properties of “wire-like” dinuclear ruthenium bis-alkynyl spiropyran complexes
Source: Royal Society of Chemistry journal article supplement (doi:10.1039/d2dt03045d), 2022-11-30
Supplement: d2dt03045d1.pdf [file d2dt03045d1.pdf]

Supporting Information

## Multifunctional switching properties of “wire-like” dinuclear ruthenium bis-alkynyl spiropyran complexes.

David Jago,<sup>a</sup> Amelia R. Langley,<sup>a,¶</sup> Samantha G. Eaves,<sup>a,‡</sup> Mark C. Walkey,<sup>a</sup> Thea Pulbrook,<sup>a, |</sup> Stephen A. Moggach,<sup>a</sup> Paul J. Low,<sup>\*,a</sup> Matthew J. Piggott,<sup>a</sup> George A. Koutsantonis<sup>\*,a</sup>

<sup>a</sup> Chemistry, School of Molecular Sciences, University of Western Australia, Crawley, Western Australia 6009, Australia

<sup>¶</sup> Current address: Electrochemical Storage Team, imec/EnergyVille, Kapeldreef 75, 3001 Leuven, Belgium. Email: Amelia.r.Langley@outlook.com

<sup>‡</sup> Current address: TSG Consulting Ltd, Knarborough, UK; email: s.g.symes1990@gmail.com

<sup>|</sup> Current address: Hydro Tasmania, Hobart, TAS 7000; Email: Thea.pulbrook@gmail.com

### Table of Contents

|                                              |    |
|----------------------------------------------|----|
| Phosphorus NMR.....                          | 2  |
| Electrochemistry.....                        | 3  |
| Spectroelectrochemistry .....                | 11 |
| Crystallography.....                         | 13 |
| UV-vis spectroscopy and Acid Switching ..... | 15 |
| Spectra.....                                 | 22 |
| DFT Calculations .....                       | 35 |

## Phosphorus NMR

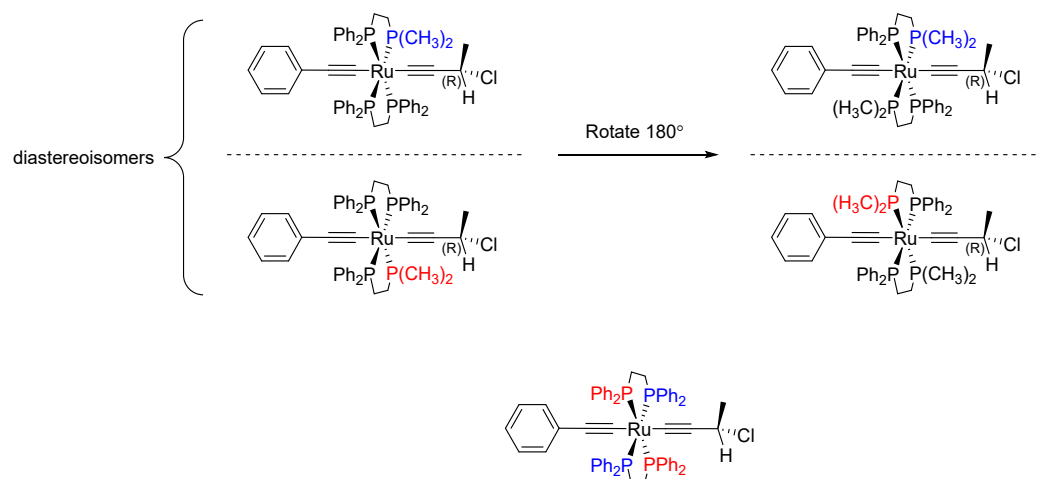

**Figure S1** The introduction of a stereocentre makes the phosphino diastereotopic. If a diphenylphosphino group cis to another is replaced with another group ( $\text{P}(\text{CH}_3)_2$  in this example), the relationship between the two isomers formed is diastereomeric.

## Electrochemistry

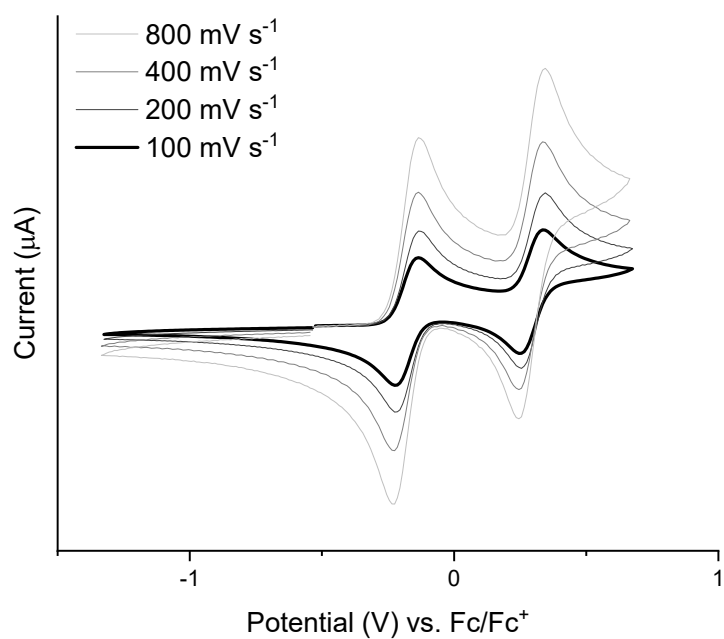

**Figure S2** Cyclic Voltammogram of SP-10 at various scan rates. All data were recorded in 0.1 M Bu<sub>4</sub>NPF<sub>6</sub> CH<sub>2</sub>Cl<sub>2</sub> using a Pt working electrode.

**Table S1** Electrochemical Data for SP-10.

| Scan Rate (mV s <sup>-1</sup> ) | $\Delta E^{+/0}$ (V) | $i_{pa}/i_{pc}$ | $\Delta E^{2+/+}$ (V) | $i_{pa}/i_{pc}$ |
|---------------------------------|----------------------|-----------------|-----------------------|-----------------|
| 100                             | 0.08                 | 0.95            | 0.09                  | 1.07            |
| 200                             | 0.10                 | 0.94            | 0.09                  | 1.07            |
| 400                             | 0.09                 | 0.94            | 0.09                  | 1.06            |
| 800                             | 0.10                 | 0.94            | 0.09                  | 1.06            |

All data were recorded in 0.1 M Bu<sub>4</sub>NPF<sub>6</sub> CH<sub>2</sub>Cl<sub>2</sub> using a Pt working electrode.

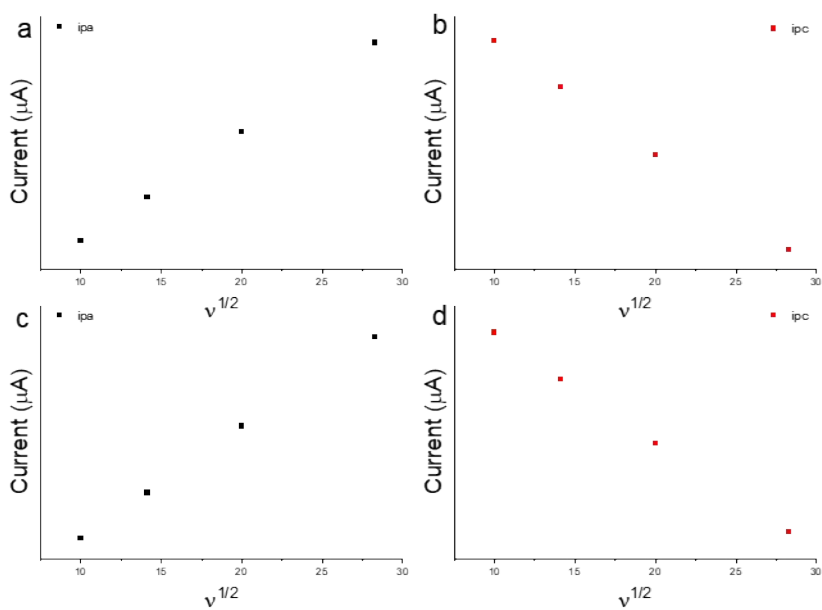

**Figure S3** Plots of scan rate( $v$ )<sup>1/2</sup> versus peak current ( $I_{pa}$  and  $I_{pc}$ ) for the first oxidation (a,b) and the second oxidation (c,d) of SP-10. All data were recorded in 0.1 M  $Bu_4NPF_6$   $CH_2Cl_2$  using a Pt working electrode.

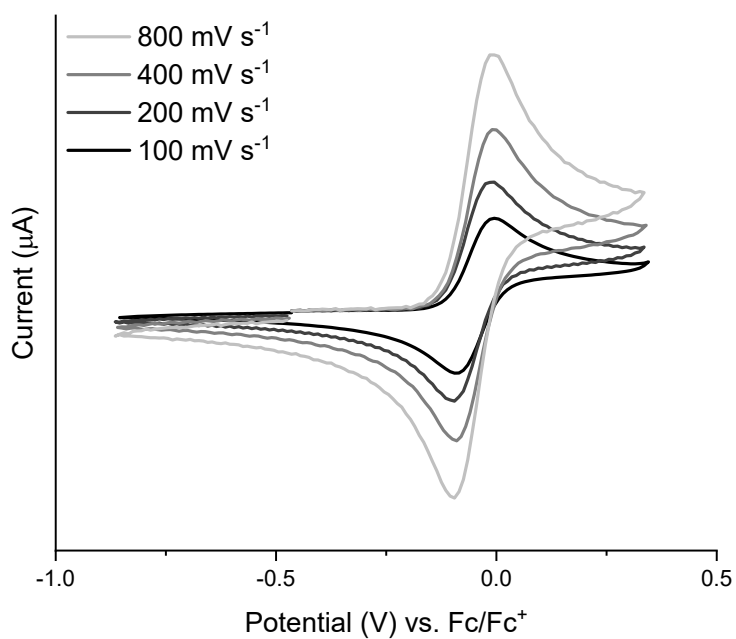

**Figure S4** Cyclic Voltammogram of SP-11 at various scan rates. All data were recorded in 0.1 M  $Bu_4NPF_6$   $CH_2Cl_2$  using a Pt working electrode.

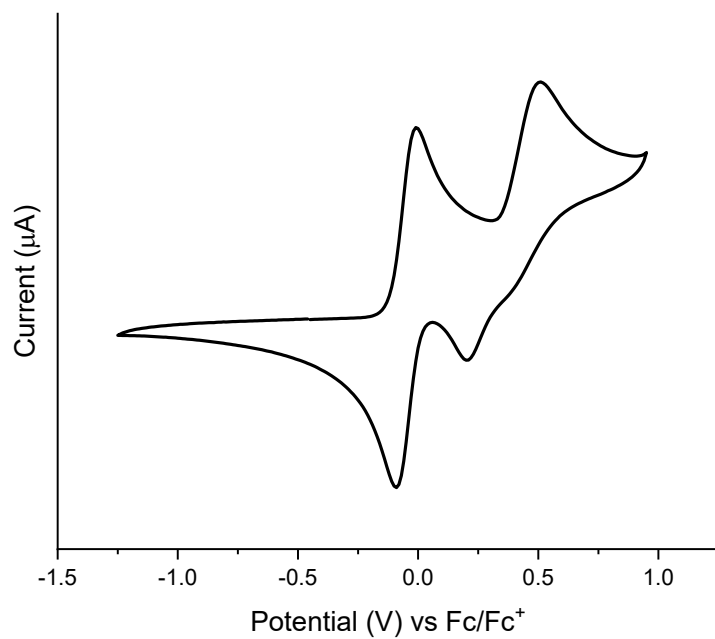

**Figure S5** Cyclic Voltammogram of SP-11 at  $100 \text{ mV s}^{-1}$ . All data were recorded in  $0.1 \text{ M Bu}_4\text{NPF}_6$  in  $\text{CH}_2\text{Cl}_2$  using a Pt working electrode.

**Table S2** Electrochemical Data for SP-11.

| Scan Rate ( $\text{mV s}^{-1}$ ) | $\Delta E^{+/0}(\text{V})$ | $i_{pa}/i_{pc}$ | $\Delta E^{2+/+}(\text{V})$ | $i_{pa}$ |
|----------------------------------|----------------------------|-----------------|-----------------------------|----------|
| 100                              | 0.09                       | 0.96            | 0.31                        | 0.35     |
| 200                              | 0.09                       | 0.94            | 0.33                        | 0.50     |
| 400                              | 0.08                       | 0.95            | 0.35                        | 0.72     |
| 800                              | 0.09                       | 0.96            | 0.40                        | 1.03     |

All data were recorded in  $0.1 \text{ M Bu}_4\text{NPF}_6$   $\text{CH}_2\text{Cl}_2$  using a Pt working electrode.

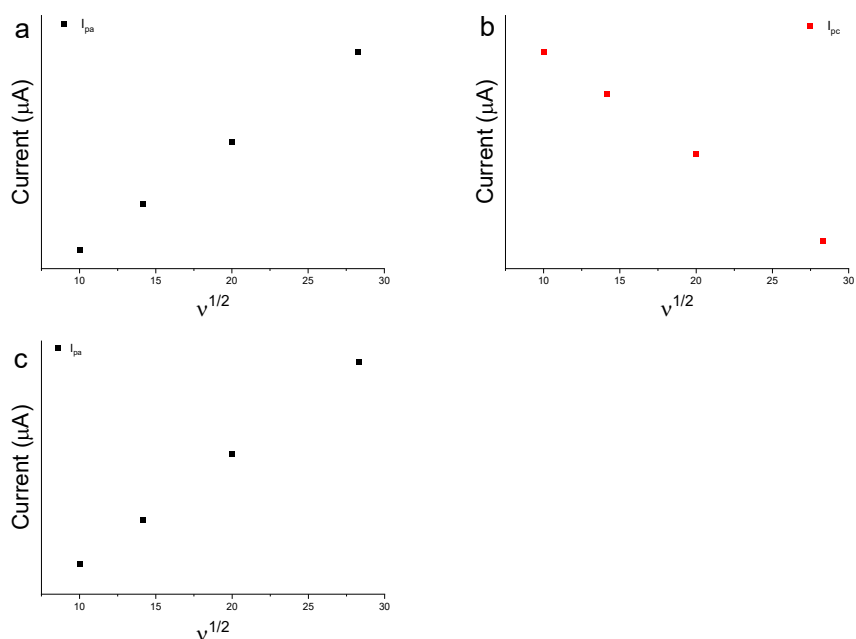

**Figure S6** Plots of scan rate( $v$ )<sup>1/2</sup> versus peak current ( $I_{pa}$  (a) and  $I_{pc}$  (b)) for the first oxidation of SP-11 and peak current ( $I_{pa}$ ) for the second oxidation (c) of complex SP-11. All data were recorded in 0.1 M Bu<sub>4</sub>NPF<sub>6</sub> CH<sub>2</sub>Cl<sub>2</sub> using a Pt working electrode.

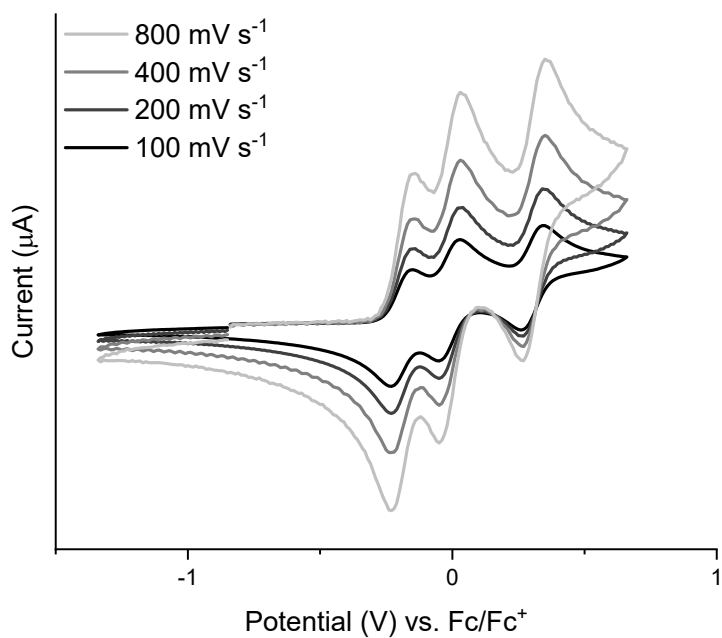

**Figure S7** Cyclic Voltammogram of SP-13 at various scan rates. All data were recorded in 0.1 M Bu<sub>4</sub>NPF<sub>6</sub> CH<sub>2</sub>Cl<sub>2</sub> using a Pt working electrode.

**Table S3** Electrochemical Data for SP-13.

| Scan Rate<br>(mV s <sup>-1</sup> ) | $\Delta E^{+/0}$ (V) | $i_{pa}$ | $\Delta E^{2+/+}$ (V) | $i_{pc}$ | $\Delta E^{3+/2+}$ (V) | $i_{pa}/i_{pc}$ |
|------------------------------------|----------------------|----------|-----------------------|----------|------------------------|-----------------|
| 100                                | 0.08                 | 0.25     | 0.09                  | 0.22     | 0.08                   | 0.86            |
| 200                                | 0.08                 | 0.35     | 0.09                  | 0.31     | 0.08                   | 0.81            |
| 400                                | 0.08                 | 0.50     | 0.09                  | 0.45     | 0.08                   | 0.82            |
| 800                                | 0.08                 | 0.73     | 0.08                  | 0.62     | 0.08                   | 0.81            |

All data were recorded in 0.1 M Bu<sub>4</sub>NPF<sub>6</sub> CH<sub>2</sub>Cl<sub>2</sub> using a Pt working electrode.

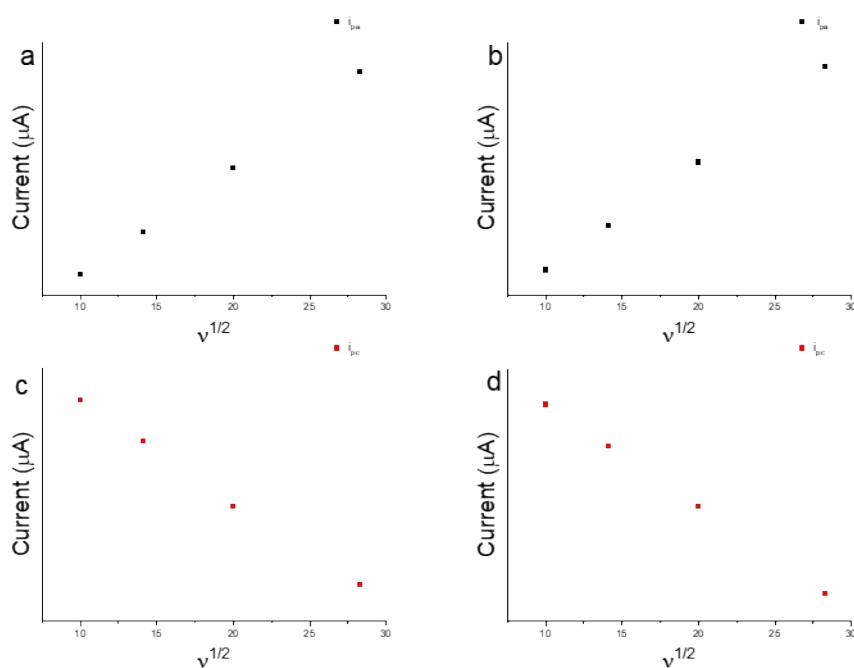

**Figure S8** Plots of scan rate ( $v$ )<sup>1/2</sup> versus peak current ( $i_{pa}$ ) for the first oxidation (a) and the third oxidation (b) and the peak current ( $i_{pc}$ ) for the second oxidation (c) and the third oxidation (d) of SP-13. All data were recorded in 0.1 M Bu<sub>4</sub>NPF<sub>6</sub> CH<sub>2</sub>Cl<sub>2</sub> using a Pt working electrode.

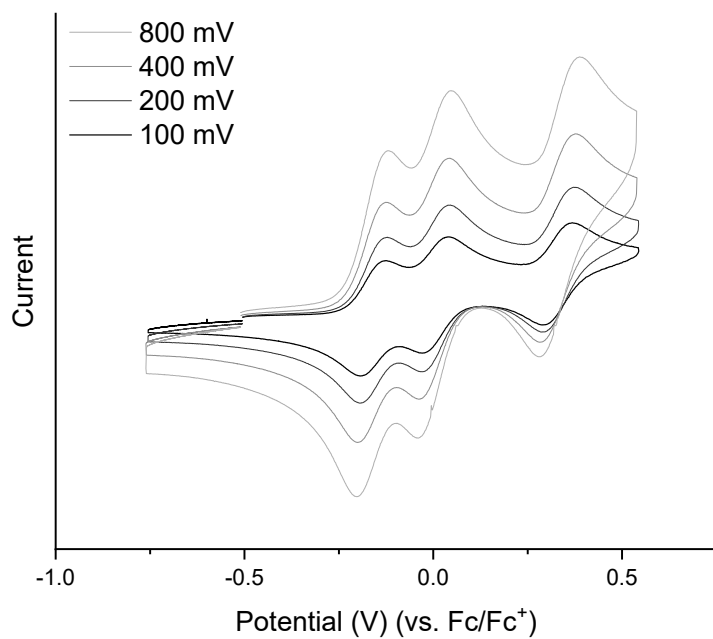

**Figure S9** Cyclic Voltammogram of SP-16 at various scan rates. All data were recorded in 0.1 M Bu<sub>4</sub>NPF<sub>6</sub> CH<sub>2</sub>Cl<sub>2</sub> using a Pt working electrode.

**Table S4** Electrochemical Data for SP-16.

| Scan Rate<br>(mV s <sup>-1</sup> ) | $\Delta E^{+/0}$ (V) | $i_{pa}$ | $\Delta E^{2+/+}$ (V) | $i_{pc}$ | $\Delta E^{3+/2+}$ (V) | $i_{pa}/i_{pc}$ |
|------------------------------------|----------------------|----------|-----------------------|----------|------------------------|-----------------|
| 100                                | 0.07                 | 1.17     | 0.07                  | 0.90     | 0.08                   | 1.03            |
| 200                                | 0.07                 | 1.62     | 0.08                  | 1.26     | 0.08                   | 1.16            |
| 400                                | 0.08                 | 2.25     | 0.08                  | 1.71     | 0.09                   | 1.11            |
| 800                                | 0.08                 | 3.06     | 0.09                  | 2.43     | 0.10                   | 1.36            |

All data were recorded in 0.1 M Bu<sub>4</sub>NPF<sub>6</sub> CH<sub>2</sub>Cl<sub>2</sub> using a Pt working electrode.



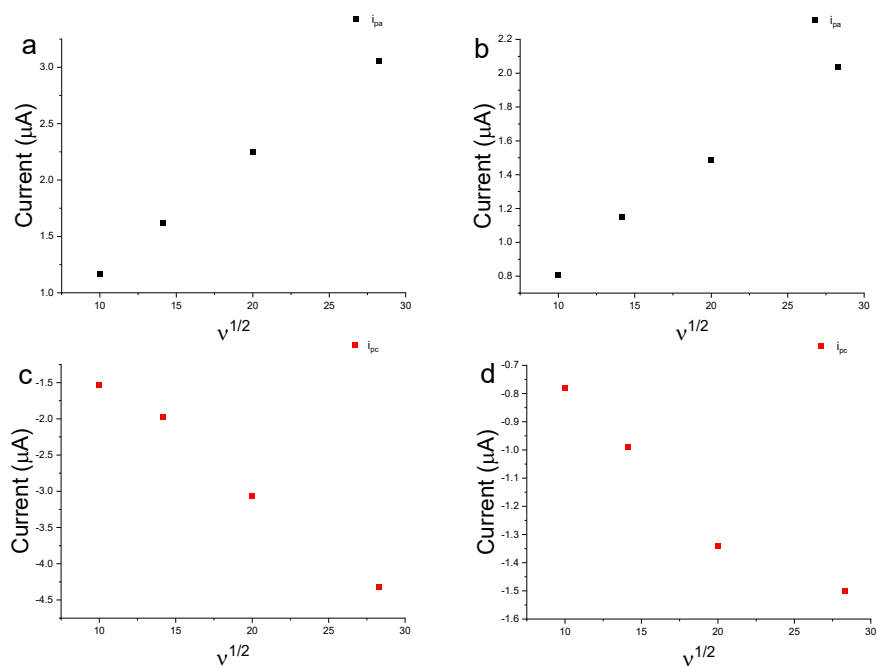

**Figure S10** Plots of scan rate ( $v^{1/2}$ ) versus peak current ( $i_{pa}$ ) for the first oxidation (a) and the third oxidation (b) and the peak current ( $i_{pc}$ ) for the second oxidation (c) and the third oxidation (d) of SP-16. All data were recorded in 0.1 M  $\text{Bu}_4\text{NPF}_6$   $\text{CH}_2\text{Cl}_2$  using a Pt working electrode.

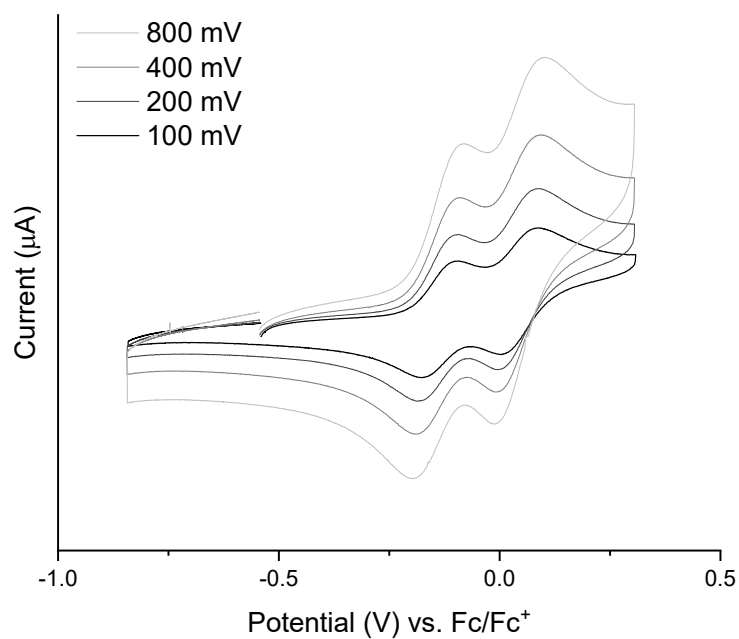

**Figure S11** Cyclic Voltammogram of SP-18 at various scan rates. All data were recorded in 0.1 M  $\text{Bu}_4\text{NPF}_6$   $\text{CH}_2\text{Cl}_2$  using a Pt working electrode.

**Table S5** Electrochemical Data for SP-18.

| Scan Rate (mV s <sup>-1</sup> ) | $\Delta E^{+/0}$ (V) | $i_{pa}$ | $\Delta E^{2+/+}$ (V) | $i_{pc}$ |
|---------------------------------|----------------------|----------|-----------------------|----------|
| 100                             | 0.08                 | 0.63     | 0.08                  | 0.66     |
| 200                             | 0.09                 | 0.94     | 0.09                  | 0.90     |
| 400                             | 0.10                 | 1.28     | 0.10                  | 1.17     |
| 800                             | 0.12                 | 1.80     | 0.12                  | 1.58     |

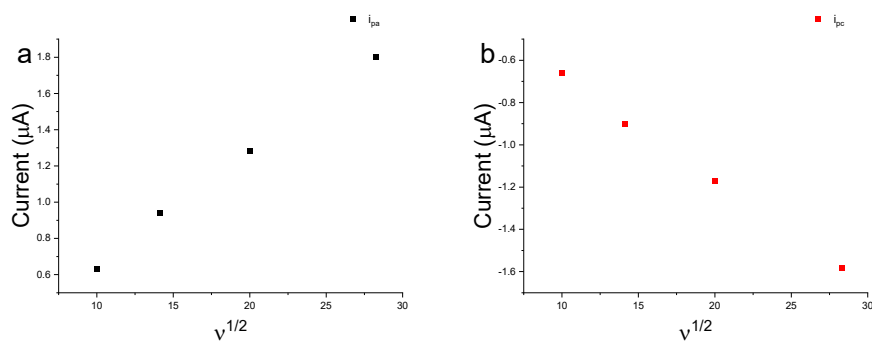

All data were recorded in 0.1 M  $\text{Bu}_4\text{NPF}_6$   $\text{CH}_2\text{Cl}_2$  using a Pt working electrode.

**Figure S12** Plots of scan rate ( $v$ )<sup>1/2</sup> versus peak current ( $i_{pa}$ ) for the first oxidation (a) and the peak current ( $i_{pc}$ ) for the second oxidation (b) of SP-18. All data were recorded in 0.1 M  $\text{Bu}_4\text{NPF}_6$   $\text{CH}_2\text{Cl}_2$  using a Pt working electrode.

## Spectroelectrochemistry

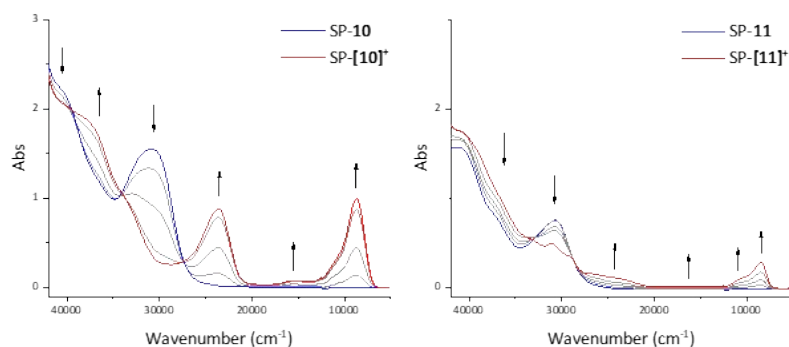

**Figure S13** UV-vis-NIR spectra changes upon oxidation of complexes SP-10 and SP-11 to SP-[10]<sup>+</sup> and SP-[11]<sup>+</sup>. All data were recorded in 0.1 M Bu<sub>4</sub>NPF<sub>6</sub> CH<sub>2</sub>Cl<sub>2</sub> using a Pt working electrode.

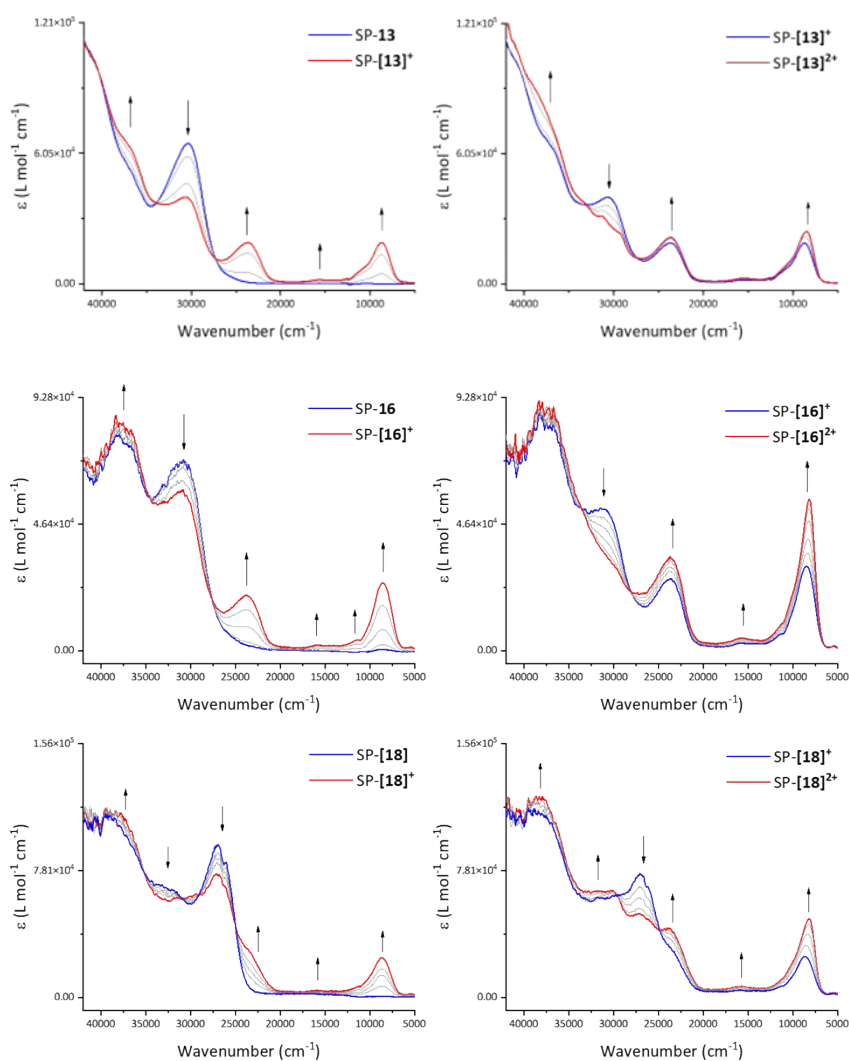

**Figure S14** UV-vis-NIR spectra changes upon oxidation of complexes 13, 16 and 18 to [13]<sup>+</sup>, [16]<sup>+</sup> and [18]<sup>+</sup>, and [13]<sup>2+</sup>, [16]<sup>2+</sup> and [18]<sup>2+</sup>. All data were recorded in 0.1 M Bu<sub>4</sub>NPF<sub>6</sub> CH<sub>2</sub>Cl<sub>2</sub> using a Pt working electrode.

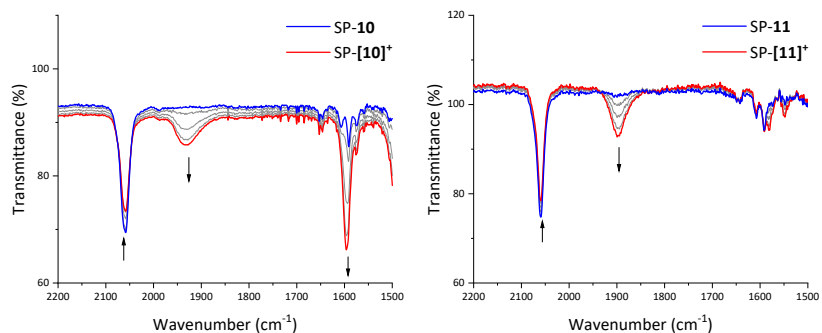

**Figure S15** IR spectra changes upon oxidation of complexes SP-10 and SP-11 to SP-[10]<sup>+</sup> and SP-[11]<sup>+</sup>. All data were recorded in 0.1 M Bu<sub>4</sub>NPF<sub>6</sub> CH<sub>2</sub>Cl<sub>2</sub> using a Pt working electrode.

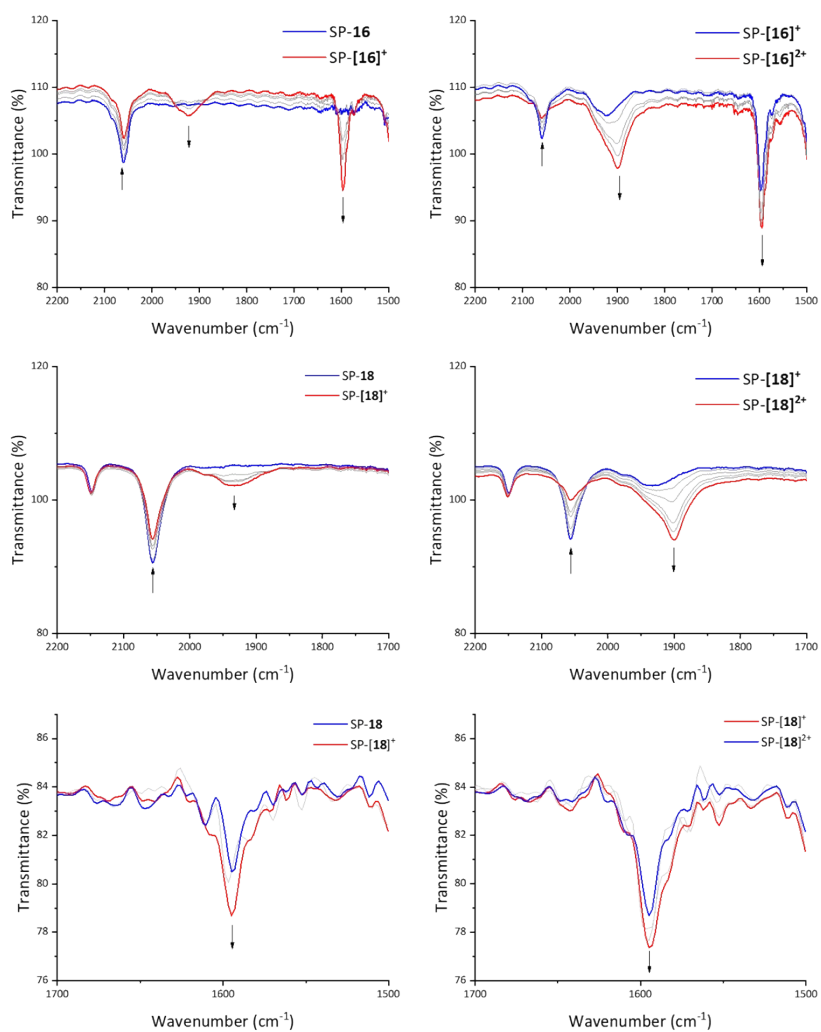

**Figure S16** IR spectra changes upon oxidation of complexes SP-16 and SP-18 to SP-[16]<sup>+</sup> and SP-[18]<sup>+</sup>, and SP-[16]<sup>2+</sup> and SP-[18]<sup>2+</sup>. All data were recorded in 0.1 M Bu<sub>4</sub>NPF<sub>6</sub> CH<sub>2</sub>Cl<sub>2</sub> using a Pt working electrode.

## Crystallography

Table S6. Crystal Data and structure refinement

| Compound                                                                                         | SP-10                                                                                                                                                                                                                                                                                       | SP-13                                                                                                                                                                                                                                                                                                                                                                                                  |
|--------------------------------------------------------------------------------------------------|---------------------------------------------------------------------------------------------------------------------------------------------------------------------------------------------------------------------------------------------------------------------------------------------|--------------------------------------------------------------------------------------------------------------------------------------------------------------------------------------------------------------------------------------------------------------------------------------------------------------------------------------------------------------------------------------------------------|
| <b>Crystal data</b>                                                                              |                                                                                                                                                                                                                                                                                             |                                                                                                                                                                                                                                                                                                                                                                                                        |
| <b>Chemical formula</b>                                                                          | C <sub>81</sub> H <sub>71</sub> NOP <sub>4</sub> Ru·2(C <sub>4</sub> H <sub>10</sub> O)·0.5(H <sub>2</sub> O)                                                                                                                                                                               | C <sub>143</sub> H <sub>123</sub> NOP <sub>8</sub> Ru <sub>2</sub> ·CH <sub>2</sub> Cl <sub>2</sub> ·3[CH <sub>2</sub> Cl <sub>2</sub> ]                                                                                                                                                                                                                                                               |
| <b><i>M</i><sub>r</sub></b>                                                                      | 1456.58                                                                                                                                                                                                                                                                                     | 2661.02                                                                                                                                                                                                                                                                                                                                                                                                |
| <b>Crystal system, space group</b>                                                               | Monoclinic, <i>P</i> 2 <sub>1</sub>                                                                                                                                                                                                                                                         | Triclinic, <i>P</i> <sup>1</sup>                                                                                                                                                                                                                                                                                                                                                                       |
| <b><i>a</i>, <i>b</i>, <i>c</i> (Å)</b>                                                          | 9.4183 (1), 31.4732 (2), 13.0007 (1)                                                                                                                                                                                                                                                        | 9.8197 (3), 12.7046 (4), 54.4568 (17)                                                                                                                                                                                                                                                                                                                                                                  |
| <b><i>a</i>, <i>b</i>, <i>γ</i> (°)</b>                                                          | 90, 104.668 (1), 90                                                                                                                                                                                                                                                                         | 85.315 (3), 88.454 (3), 73.248 (3)                                                                                                                                                                                                                                                                                                                                                                     |
| <b><i>V</i> (Å<sup>3</sup>)</b>                                                                  | 3728.12 (6)                                                                                                                                                                                                                                                                                 | 6483.7 (4)                                                                                                                                                                                                                                                                                                                                                                                             |
| <b><i>μ</i> (mm<sup>-1</sup>)</b>                                                                | 2.91                                                                                                                                                                                                                                                                                        | 4.74                                                                                                                                                                                                                                                                                                                                                                                                   |
| <b>Crystal size (mm)</b>                                                                         | 0.25 × 0.13 × 0.13                                                                                                                                                                                                                                                                          | 0.18 × 0.07 × 0.05                                                                                                                                                                                                                                                                                                                                                                                     |
| <b>Data collection</b>                                                                           |                                                                                                                                                                                                                                                                                             |                                                                                                                                                                                                                                                                                                                                                                                                        |
| <b>Absorption correction</b>                                                                     | Gaussian<br><i>CrysAlis PRO</i> 1.171.41.103a (Rigaku Oxford Diffraction, 2021) Numerical absorption correction based on gaussian integration over a multifaceted crystal model Empirical absorption correction using spherical harmonics, implemented in SCALE3 ABSPACK scaling algorithm. | Analytical<br><i>CrysAlis PRO</i> 1.171.41.103a (Rigaku Oxford Diffraction, 2021) Analytical numeric absorption correction using a multifaceted crystal model based on expressions derived by R.C. Clark & J.S. Reid. (Clark, R. C. & Reid, J. S. (1995). <i>Acta Cryst.</i> A51, 887-897) Empirical absorption correction using spherical harmonics, implemented in SCALE3 ABSPACK scaling algorithm. |
| <b><i>T</i><sub>min</sub>, <i>T</i><sub>max</sub></b>                                            | 0.613, 1.000                                                                                                                                                                                                                                                                                | 0.816, 0.922                                                                                                                                                                                                                                                                                                                                                                                           |
| <b>No. of measured, independent and observed [<i>I</i> &gt; 2<i>s</i>(<i>I</i>)] reflections</b> | 71086, 14932, 14198                                                                                                                                                                                                                                                                         | 41885, 41885, 33140                                                                                                                                                                                                                                                                                                                                                                                    |
| <b><i>R</i><sub>int</sub></b>                                                                    | 0.053                                                                                                                                                                                                                                                                                       | 0.1517                                                                                                                                                                                                                                                                                                                                                                                                 |
| <b>(<i>sin</i> <i>q</i>/<i>l</i>)<sub>max</sub> (Å<sup>-1</sup>)</b>                             | 0.628                                                                                                                                                                                                                                                                                       | 0.595                                                                                                                                                                                                                                                                                                                                                                                                  |
| <b>Refinement</b>                                                                                |                                                                                                                                                                                                                                                                                             |                                                                                                                                                                                                                                                                                                                                                                                                        |

|                                                                             |                                                                                |                                                                                  |
|-----------------------------------------------------------------------------|--------------------------------------------------------------------------------|----------------------------------------------------------------------------------|
| <b><math>R[F^2 &gt; 2s(F^2)],</math><br/><b><math>wR(F^2), S</math></b></b> | 0.045, 0.121, 1.04                                                             | 0.174, 0.390, 1.07                                                               |
| <b>No. of reflections</b>                                                   | 14932                                                                          | 41885                                                                            |
| <b>No. of parameters</b>                                                    | 863                                                                            | 521                                                                              |
| <b>No. of restraints</b>                                                    | 19                                                                             | 1210                                                                             |
|                                                                             | $w = 1/[s^2(F_o^2) + (0.0703P)^2 + 4.3486P]$<br>where $P = (F_o^2 + 2F_c^2)/3$ | $w = 1/[s^2(F_o^2) + (0.0829P)^2 + 171.2715P]$<br>where $P = (F_o^2 + 2F_c^2)/3$ |
| <b><math>\Delta\rho_{\max}, \Delta\rho_{\min}</math> (e Å<sup>-3</sup>)</b> | 1.90, -0.67                                                                    | 3.13, -2.31                                                                      |
| <b>Absolute structure</b>                                                   | Refined as an inversion twin.                                                  | –                                                                                |
| <b>Absolute structure parameter</b>                                         | 0.430 (9)                                                                      | –                                                                                |

Computer programs: *CrysAlis PRO* 1.171.41.103a (Rigaku OD, 2021), *SHELXT* 2018/2 (Sheldrick, 2018), *XS* (Sheldrick, 2008), *XL* (Sheldrick, 2008), *Olex2* 1.5 (Dolomanov *et al.*, 2009).

## UV-vis spectroscopy and Acid Switching

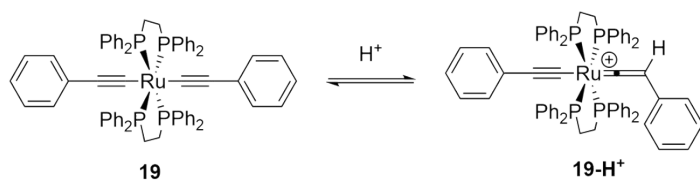

**Figure S17** Protonation of **19**.

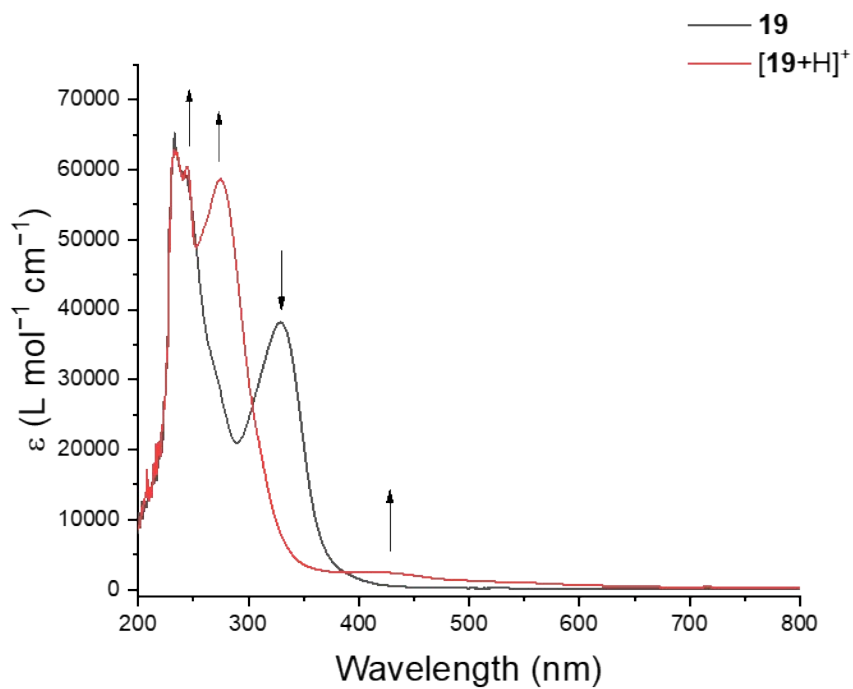

**Figure S18** UV-vis spectral changes accompanying the addition of TFA to a CH<sub>2</sub>Cl<sub>2</sub> solution of **19**.

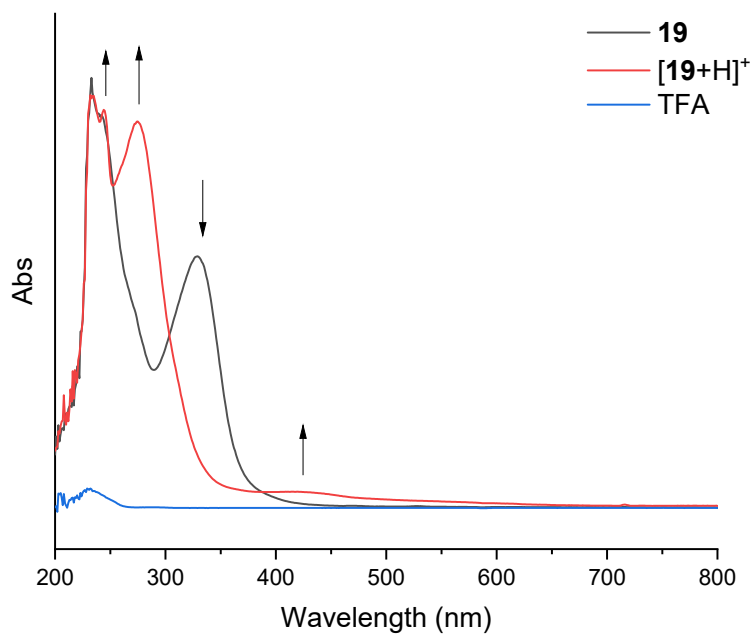

**Figure S19** UV-vis spectral changes accompanying the addition of TFA to a  $\text{CH}_2\text{Cl}_2$  solution of **19** with absorbance of TFA overlayed.

**Table S7** Absorbance peaks ( $\lambda_{\text{max}}$ ) for **19** (in  $\text{CH}_2\text{Cl}_2$ ) and its protonated vinylidene form.

| Complex                   | Absorbance / $\lambda_{\text{max}}$ (nm) ( $\epsilon / \text{L mol}^{-1} \text{cm}^{-1}$ ) |
|---------------------------|--------------------------------------------------------------------------------------------|
| <b>19</b>                 | 239 (59,000), 329 (38,000)                                                                 |
| <b>[19+H]<sup>+</sup></b> | 234 (62,000), 244 (60,000), 275 (59,000), 416 (2500)                                       |



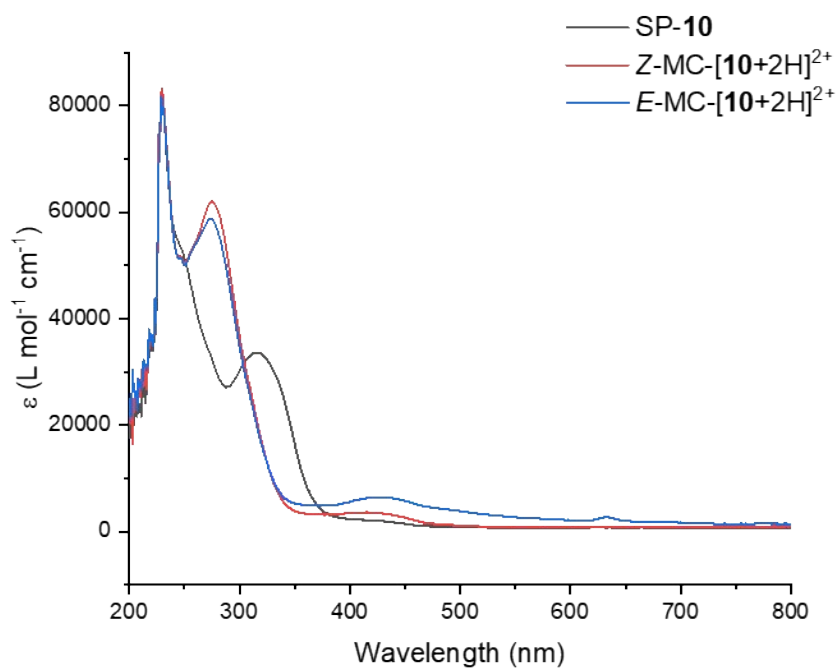

**Figure S20** UV-vis spectral changes accompanying the addition of excess TFA to a CH<sub>2</sub>Cl<sub>2</sub> solution of SP-10 and subsequent exposure to UV light.

**Table S8** Absorbance peaks ( $\lambda_{\max}$ ) for SP-10 (in CH<sub>2</sub>Cl<sub>2</sub>) and its protonated states.

| Complex                    | Absorbance / $\lambda_{\max}$ (nm) ( $\epsilon$ / L mol <sup>-1</sup> cm <sup>-1</sup> ) |
|----------------------------|------------------------------------------------------------------------------------------|
| SP-10                      | 230 (82,000), 315 (33,000)                                                               |
| Z-MC-[10+2H] <sup>2+</sup> | 230 (83,000), 275 (62,000), 414 (3800)                                                   |
| E-MC-[10+2H] <sup>2+</sup> | 230 (82,000), 275 (58,000), 427 (64,000), 633 (2800)                                     |
| SP-[10+H] <sup>+</sup>     | 275, 417                                                                                 |
| E-MC-[10+H] <sup>+</sup>   | 275, 421, 622                                                                            |

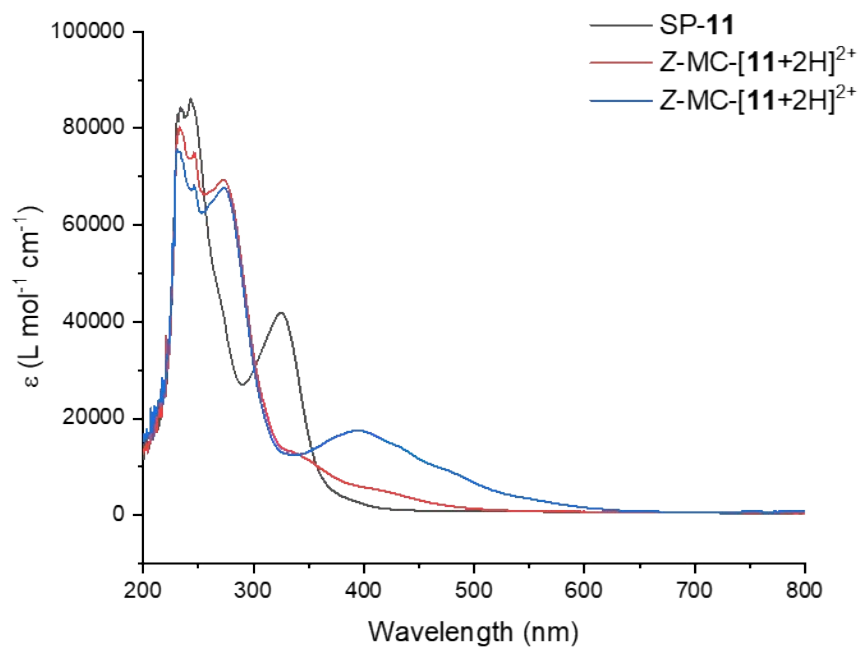

**Figure S21** UV-vis spectral changes accompanying the addition of excess TFA to a  $\text{CH}_2\text{Cl}_2$  solution of SP-11 and subsequent exposure to UV light.

**Table S9** Absorbance peaks ( $\lambda_{\text{max}}$ ) for SP-11 (in  $\text{CH}_2\text{Cl}_2$ ) and its protonated states.

| Complex                    | Absorbance / $\lambda_{\text{max}}$ (nm) ( $\epsilon$ / $\text{L mol}^{-1} \text{cm}^{-1}$ ) |
|----------------------------|----------------------------------------------------------------------------------------------|
| SP-11                      | 244 (86,000), 325(42,000)                                                                    |
| Z-MC-[11+2H] <sup>2+</sup> | 247 (75,000), 273 (69,000), 337 (13,000), 400 (5300)                                         |
| E-MC-[11+2H] <sup>2+</sup> | 247 (68,000), 274 (68,000), 395 (17,000)                                                     |

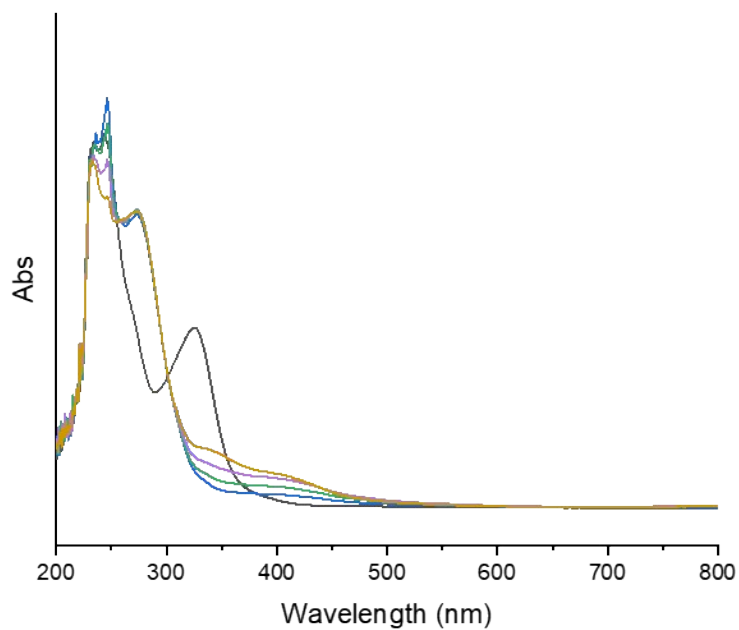

**Figure S22** UV-vis spectral changes accompanying the addition of an equivalent and subsequent excess of TFA to a  $\text{CH}_2\text{Cl}_2$  solution of SP-11

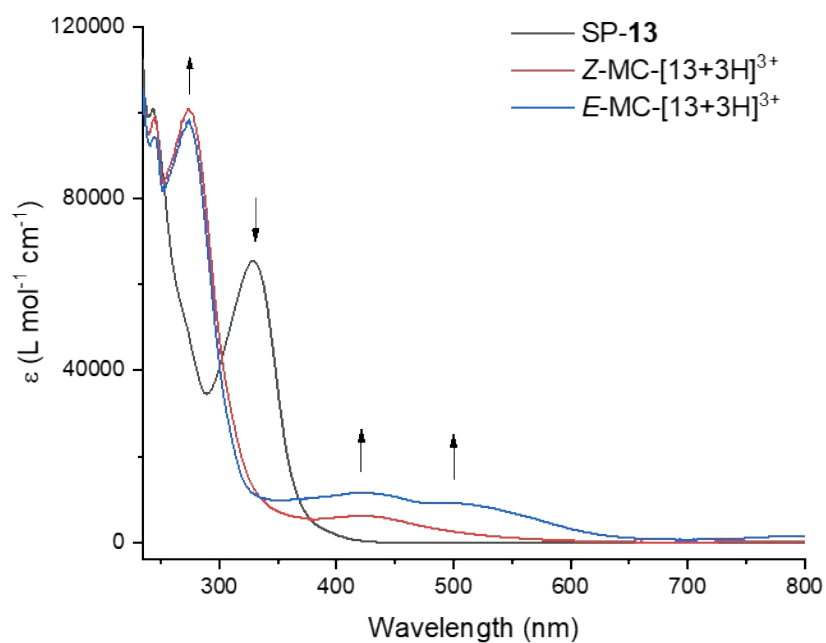

**Figure S23** UV-vis spectral changes accompanying the addition of excess TFA to a  $\text{CH}_2\text{Cl}_2$  solution of SP-13 and subsequent exposure to UV light.

**Table S9** Absorbance peaks ( $\lambda_{\max}$ ) for SP-13 (in  $\text{CH}_2\text{Cl}_2$ ) and its protonated states.

| Complex                    | Absorbance / $\lambda_{\max}$ (nm) ( $\epsilon / \text{L mol}^{-1} \text{cm}^{-1}$ ) |
|----------------------------|--------------------------------------------------------------------------------------|
| SP-13                      | 244 (100,000), 329 (65,000)                                                          |
| Z-MC-[13+3H] <sup>3+</sup> | 244 (98,000), 275 (100,000), 422 (5800)                                              |
| E-MC-[13+3H] <sup>3+</sup> | 244 (94,000), 275 (97,000), 422 (12,000), 500 (9300)                                 |

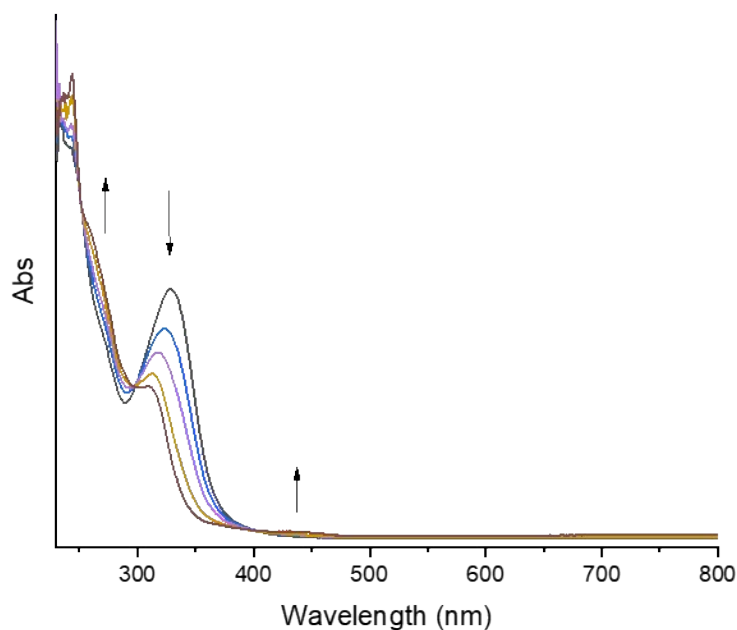

**Figure S24** UV-vis changes accompanying the attempted titration of a  $\text{CH}_2\text{Cl}_2$  solution of SP-13 with TFA.

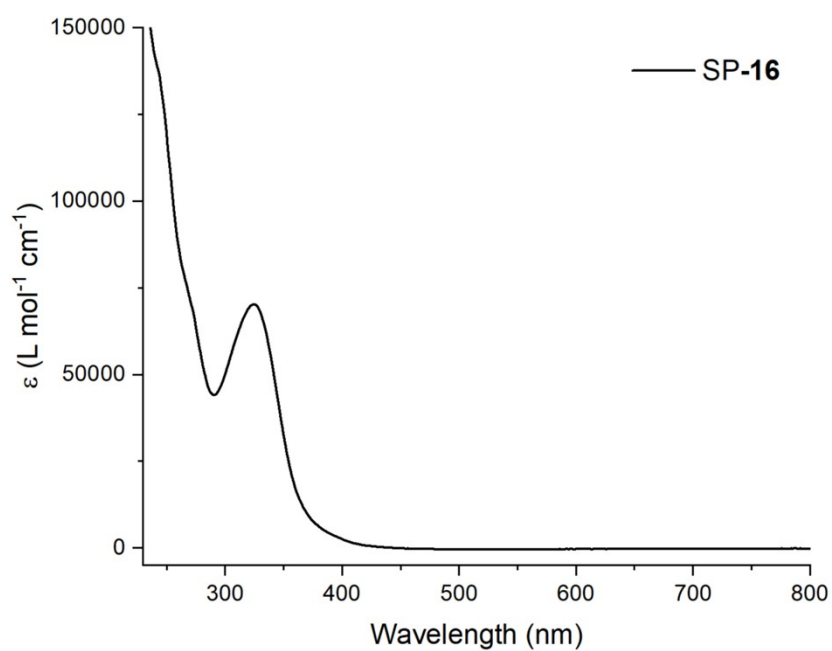

**Figure S25** UV-vis spectrum of a CH<sub>2</sub>Cl<sub>2</sub> solution of SP-16.

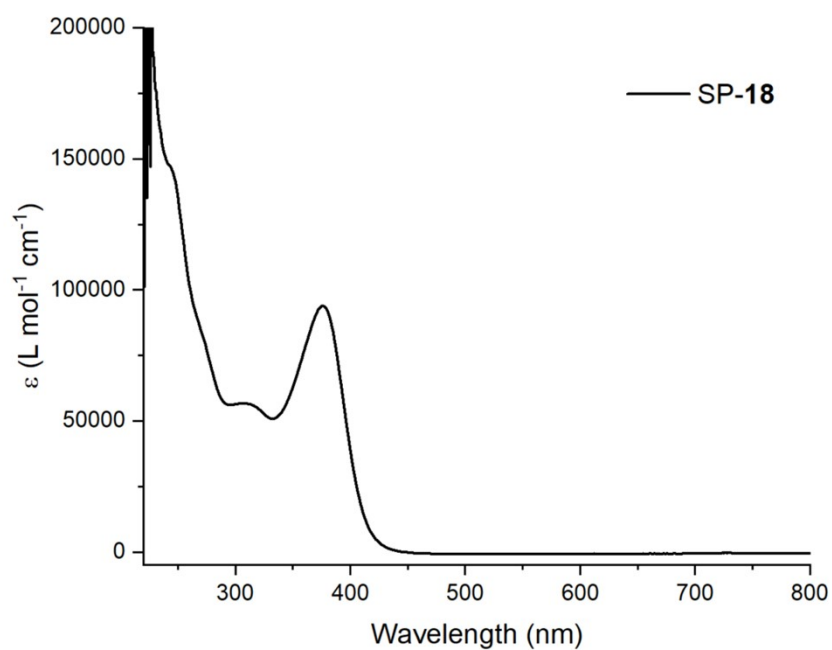

**Figure S26** UV-vis spectrum of a CH<sub>2</sub>Cl<sub>2</sub> solution of SP-18.

**Table S10** Absorbance peaks ( $\lambda_{\text{max}}$ ) for SP-13 (in CH<sub>2</sub>Cl<sub>2</sub>) and its protonated states.

| Complex | Absorbance / $\lambda_{\text{max}}$ (nm) ( $\epsilon$ / L mol <sup>-1</sup> cm <sup>-1</sup> ) |
|---------|------------------------------------------------------------------------------------------------|
| SP-16   | 243 (140,000), 323 (70,000)                                                                    |
| SP-18   | 242 (147,000), 309 (57,000), 376 (94,000)                                                      |



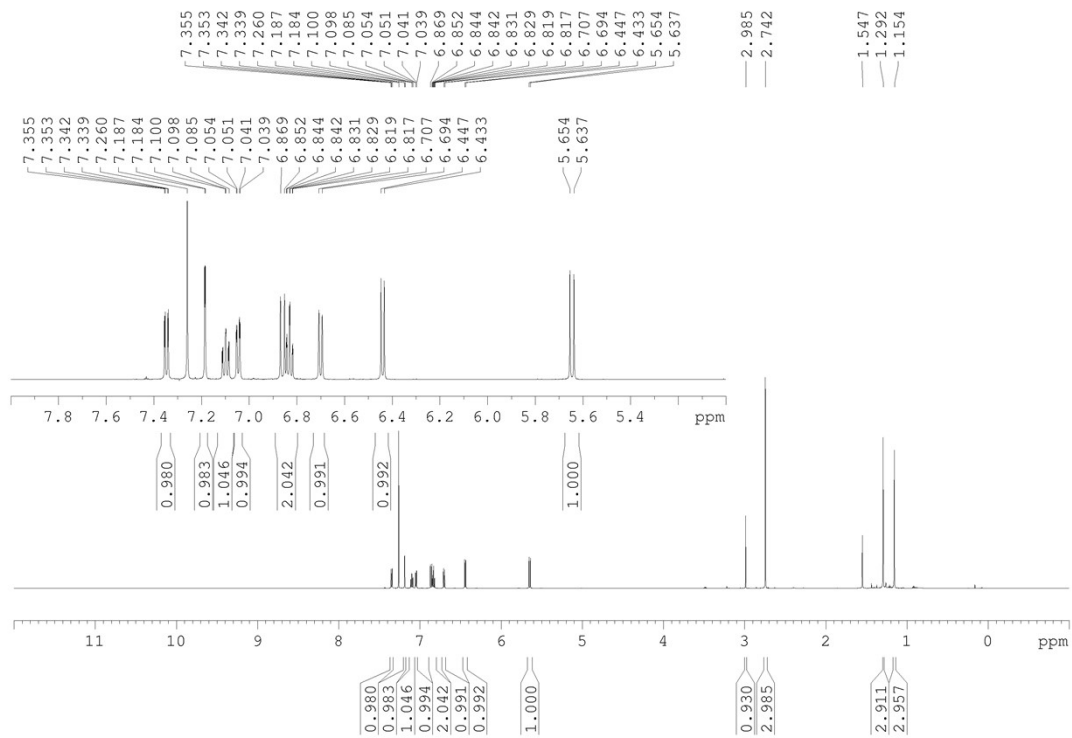

**Figure S28**  $^1\text{H}$  NMR (600 MHz) of **3** in  $\text{CDCl}_3$

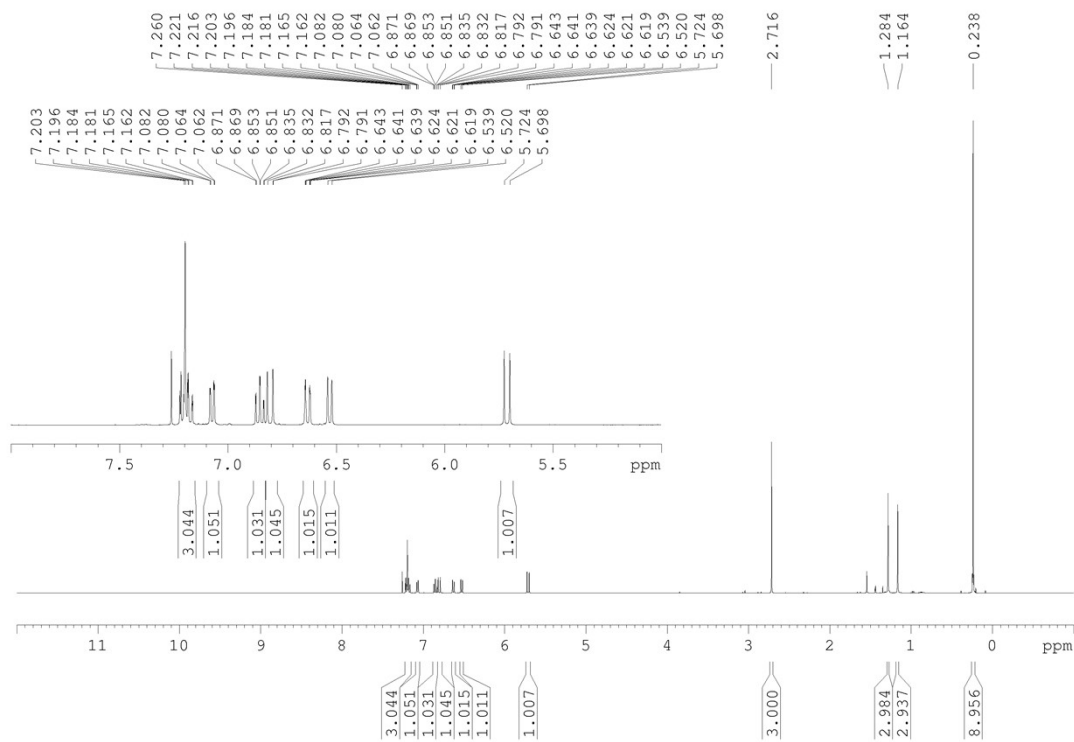

**Figure S29**  $^1\text{H}$  NMR (400 MHz) of **6** in  $\text{CDCl}_3$

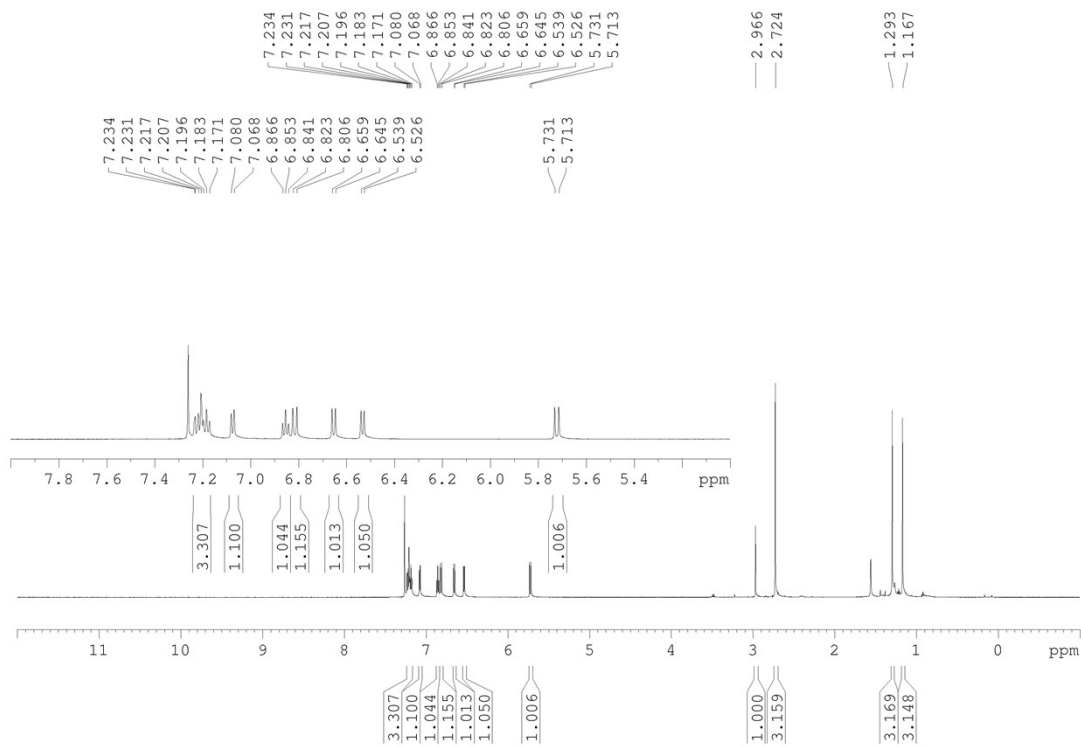

Figure S30  $^1\text{H}$  NMR (600 MHz) of **7** in  $\text{CDCl}_3$

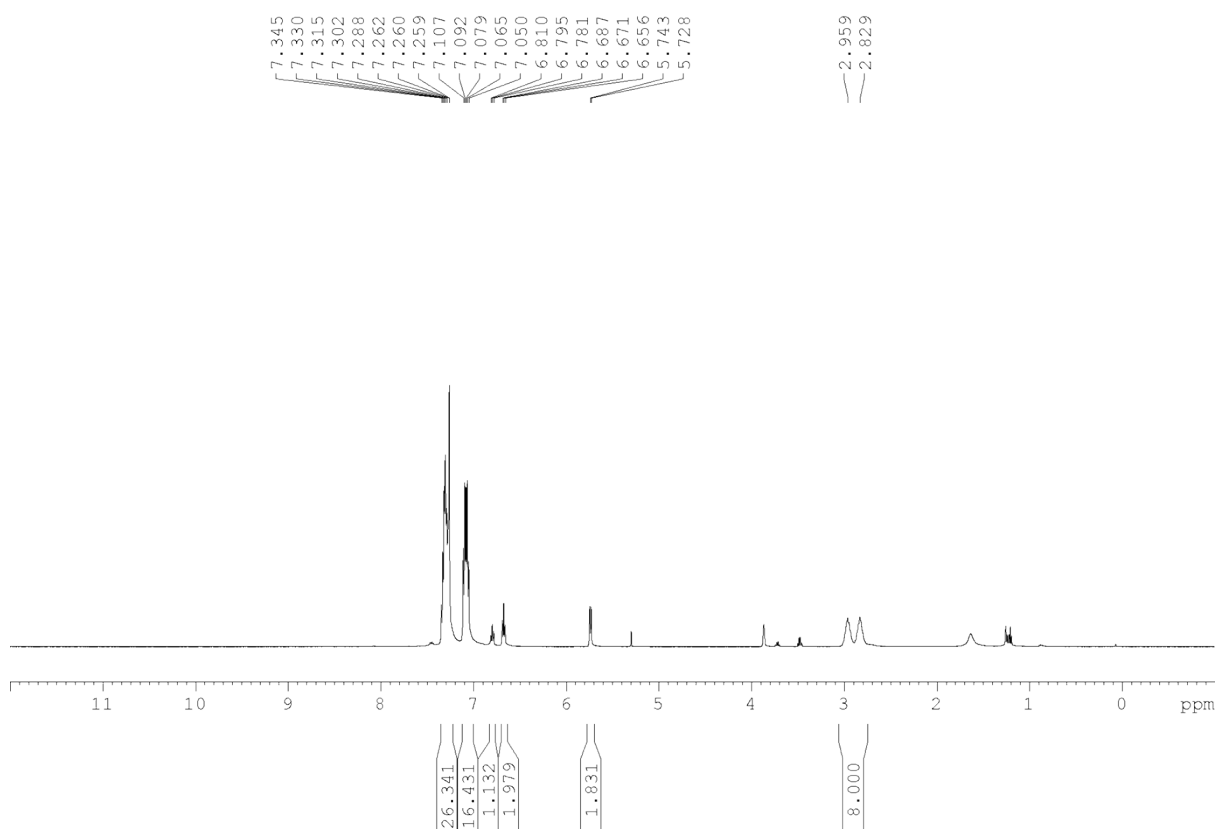

Figure S31  $^1\text{H}$  NMR (500 MHz) of **9** in  $\text{CDCl}_3$



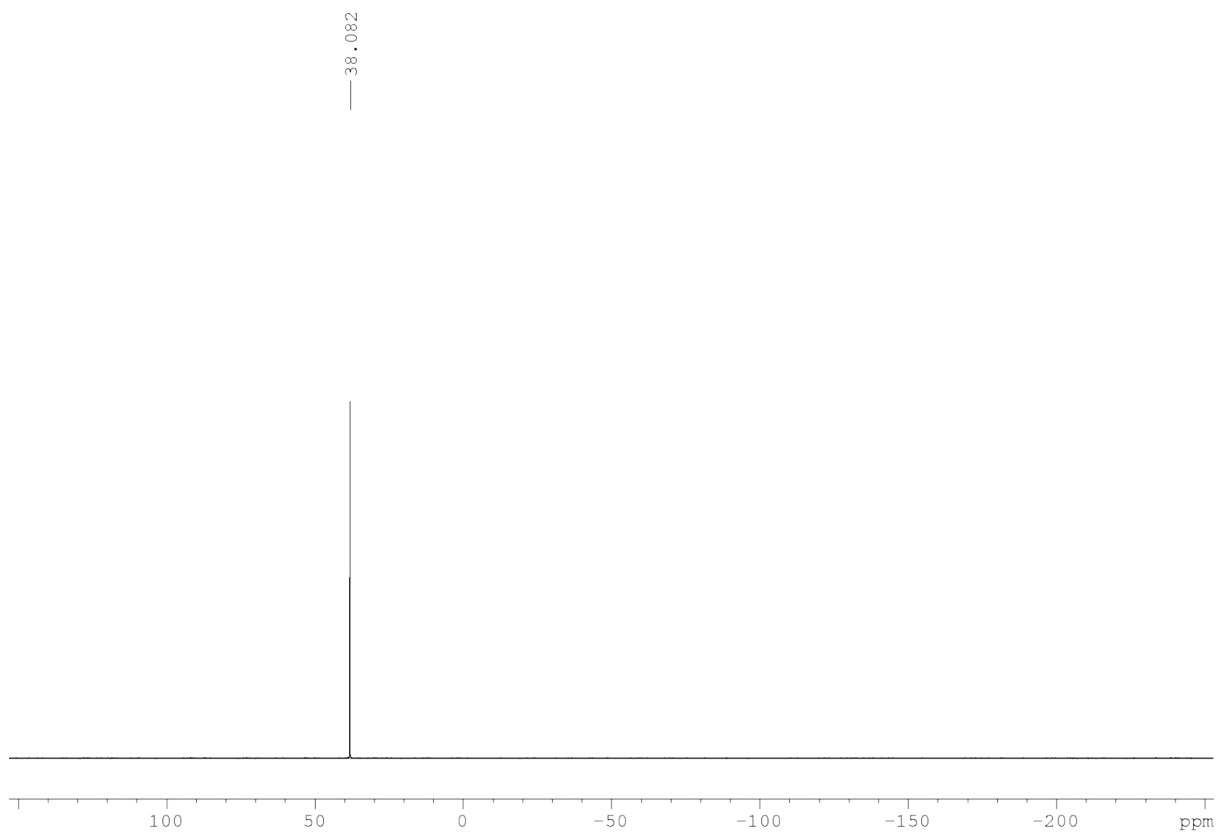

**Figure S32**  $^{31}\text{P}\{^1\text{H}\}$  NMR (400 MHz) of **9** in  $\text{CDCl}_3$

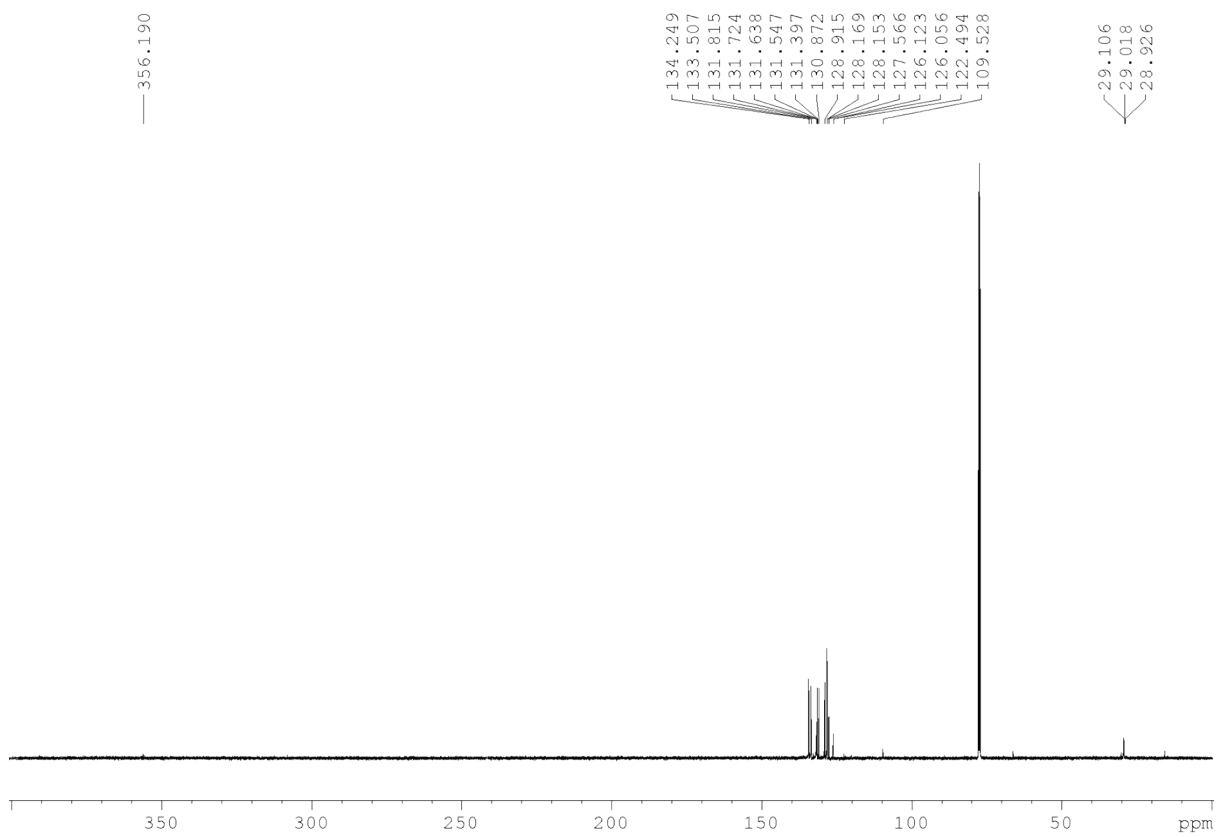

**Figure S33**  $^{13}\text{C}\{^1\text{H}\}$  NMR (500 MHz) of **9** in  $\text{CDCl}_3$

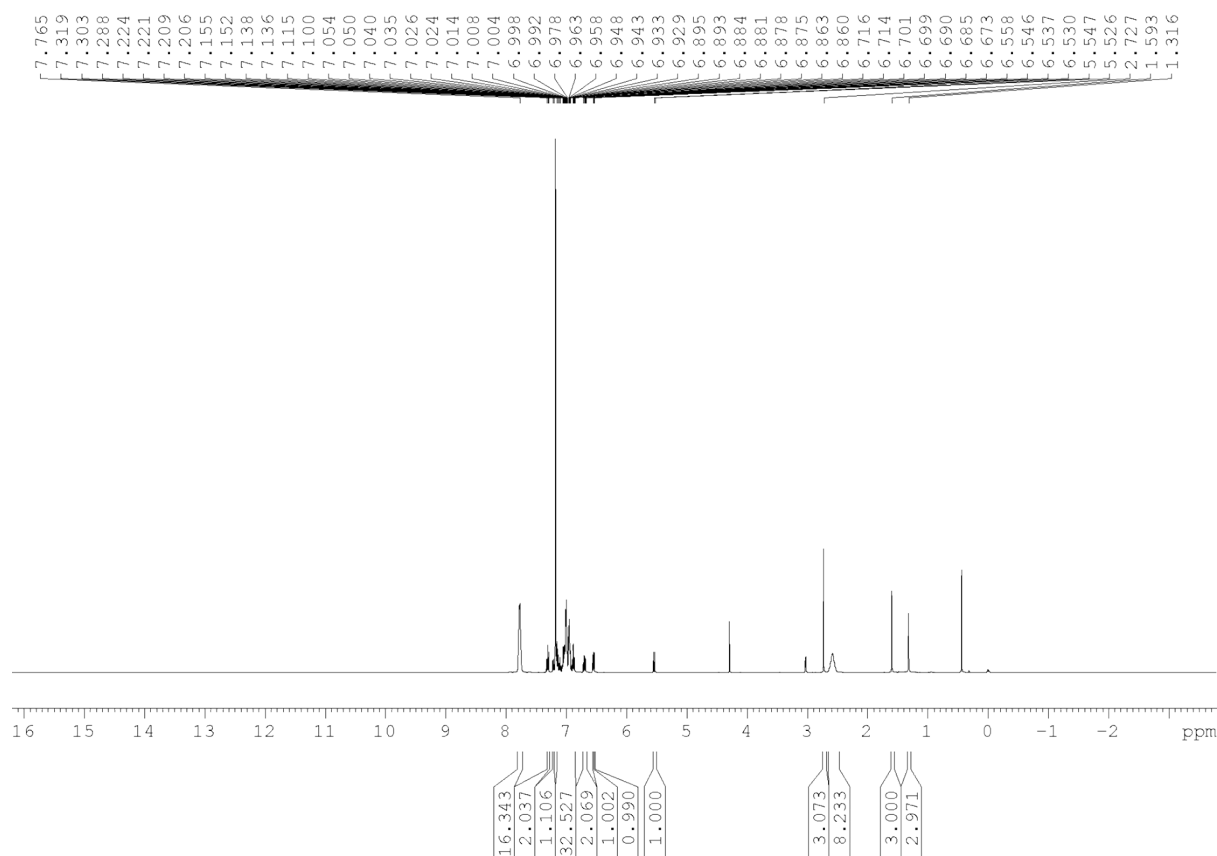

Figure S34  $^1\text{H}$  NMR (500 MHz) of SP-10 in  $\text{C}_6\text{D}_6$

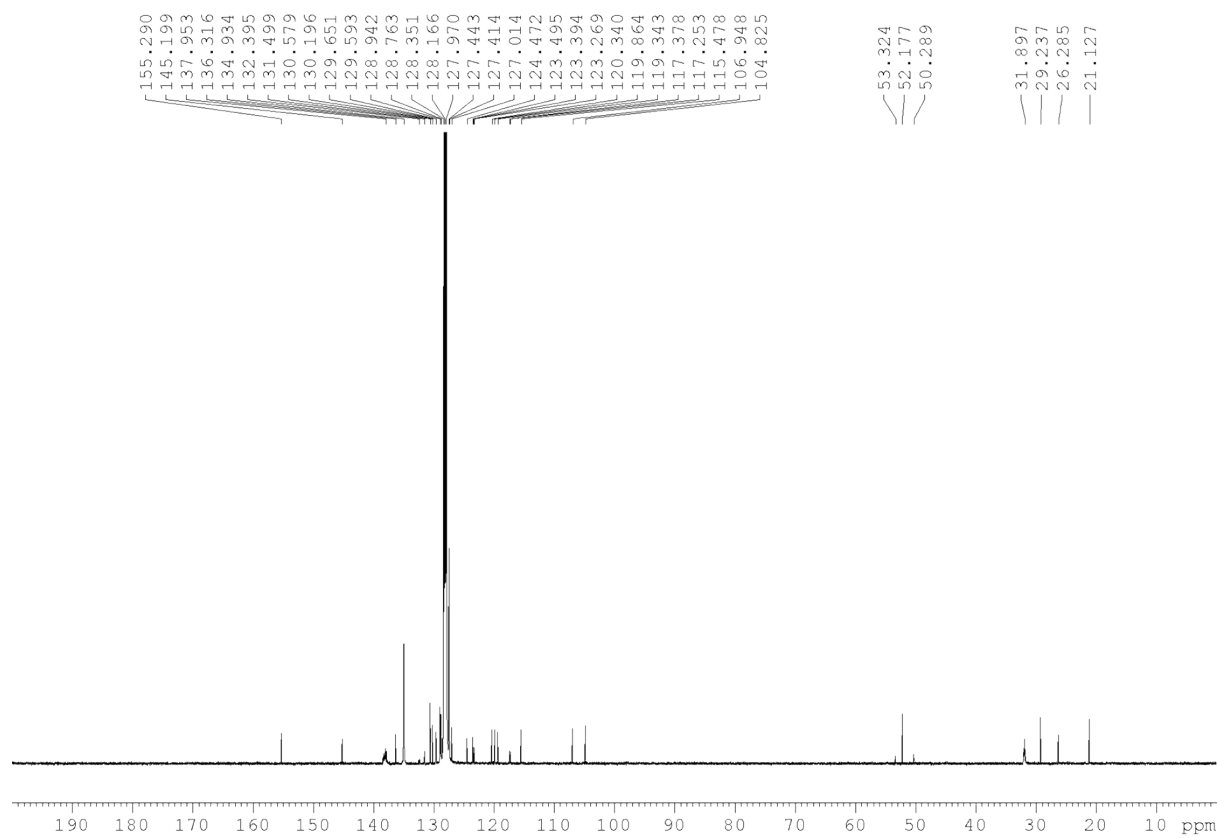

Figure S35  $^{13}\text{C}\{^1\text{H}\}$  NMR (500 MHz) of SP-10 in  $\text{C}_6\text{D}_6$

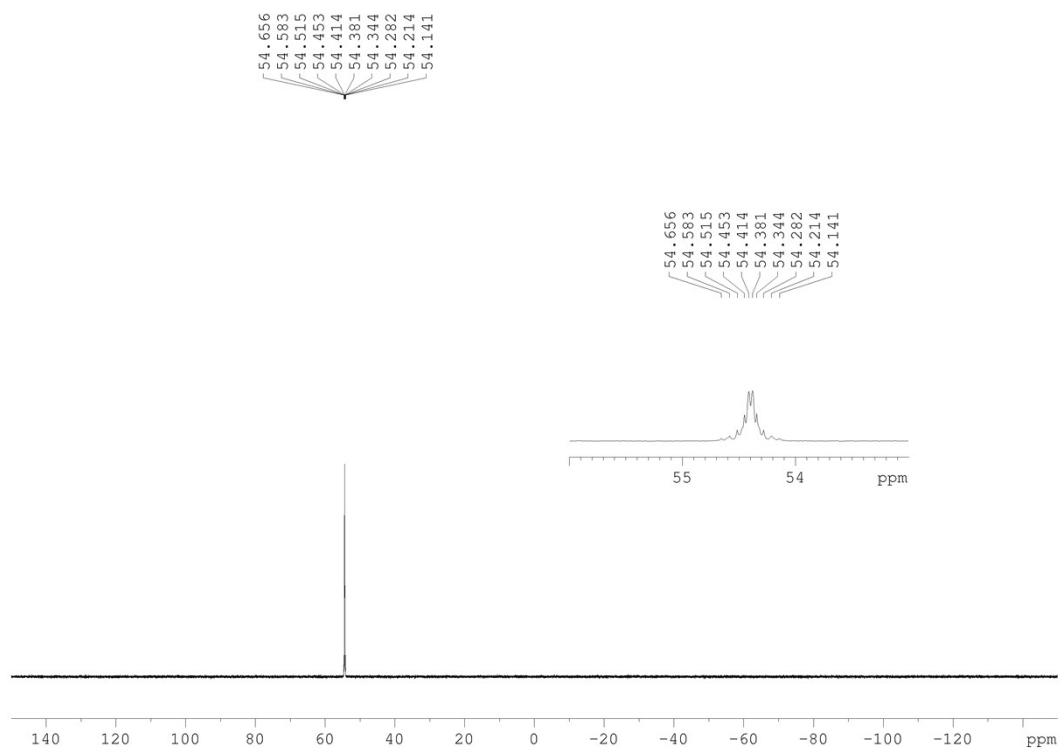

Figure S36  $^{31}\text{P}\{^1\text{H}\}$  NMR (500 MHz) of SP-10 in  $\text{C}_6\text{D}_6$

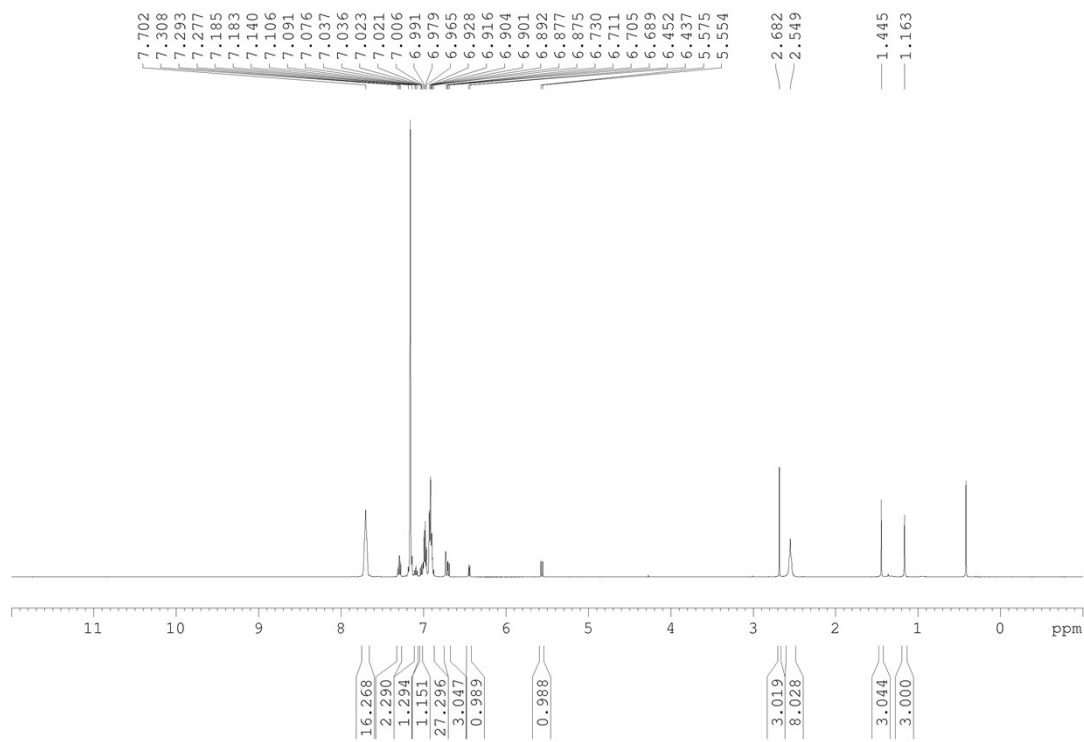

Figure S37  $^1\text{H}$  NMR (500 MHz) of SP-11 in  $\text{C}_6\text{D}_6$

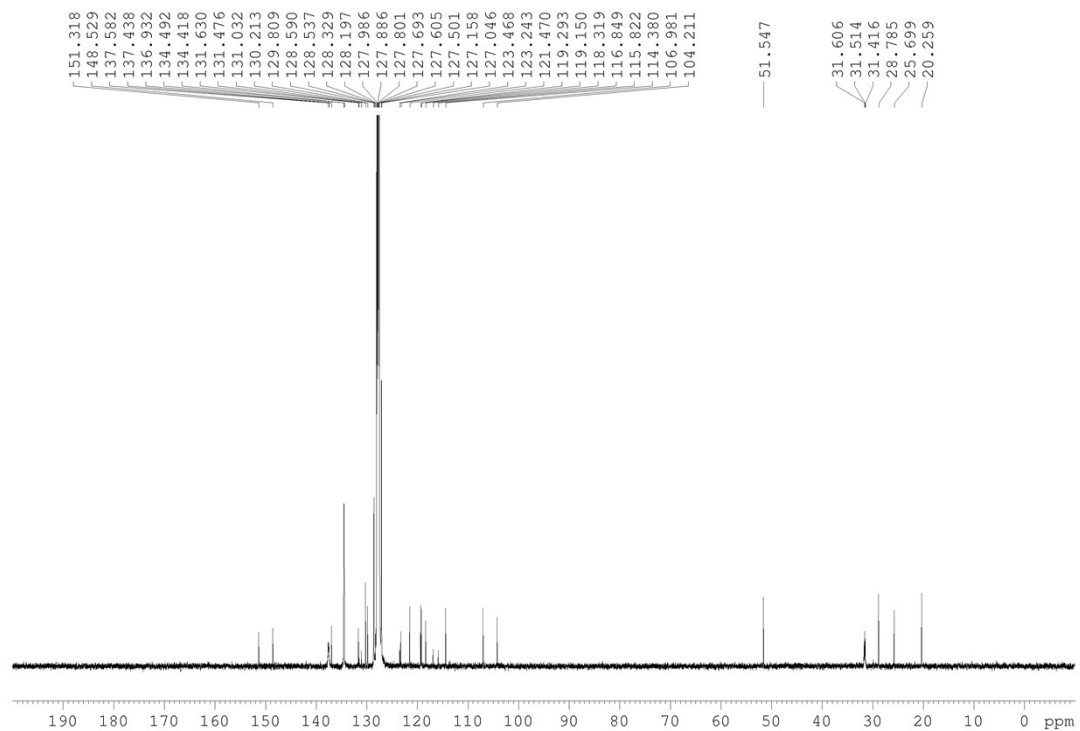

**Figure S38**  $^{13}\text{C}\{^1\text{H}\}$  NMR (500 MHz) of SP-11 in  $\text{C}_6\text{D}_6$

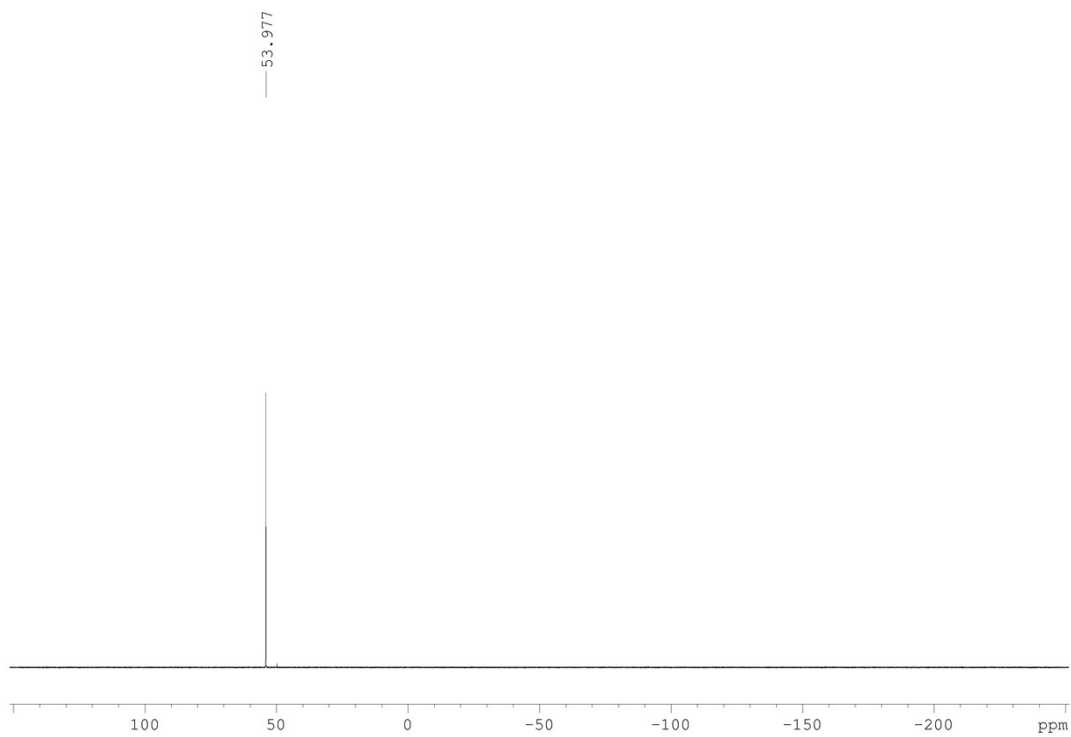

**Figure S39**  $^{31}\text{P}\{^1\text{H}\}$  NMR (500 MHz) of SP-11 in  $\text{C}_6\text{D}_6$

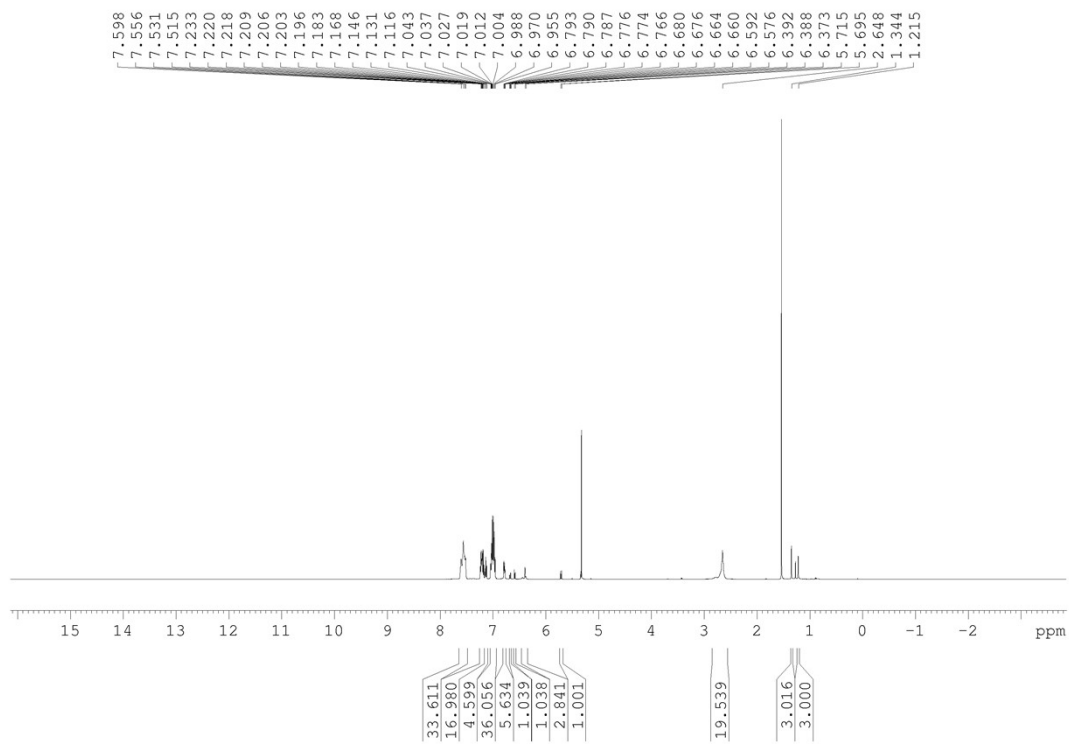

Figure S40  $^1\text{H}$  NMR (500 MHz) of SP-13 in  $\text{CD}_2\text{Cl}_2$

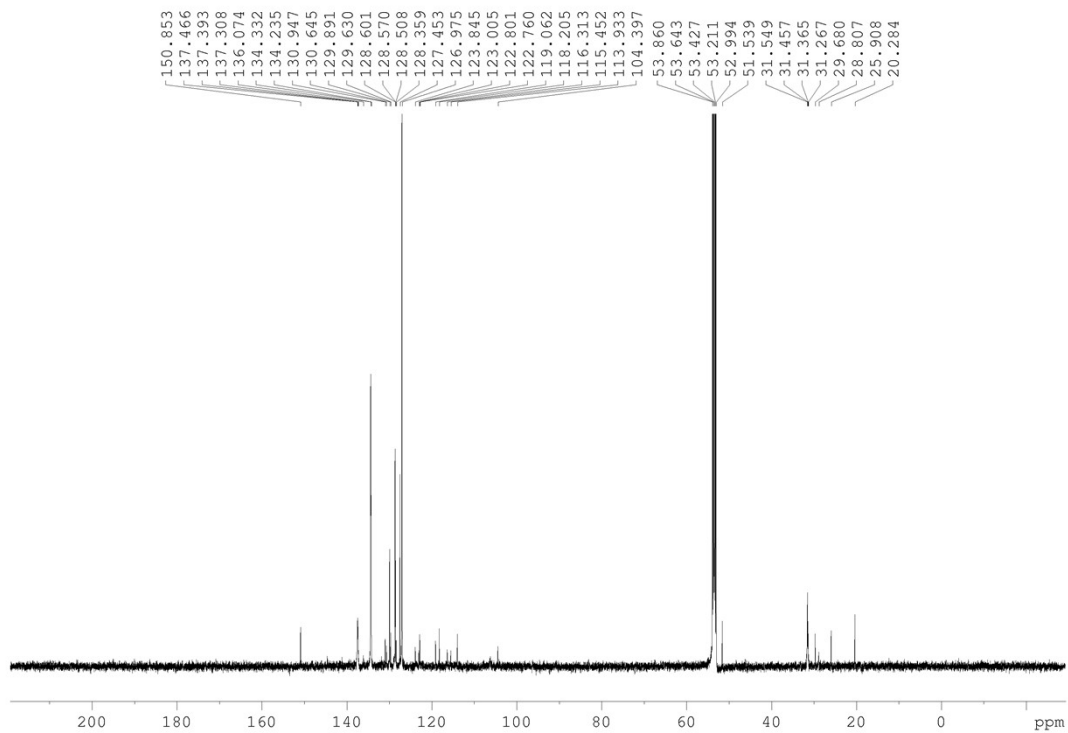

Figure S41  $^{13}\text{C}\{^1\text{H}\}$  NMR (500 MHz) of SP-13 in  $\text{CD}_2\text{Cl}_2$

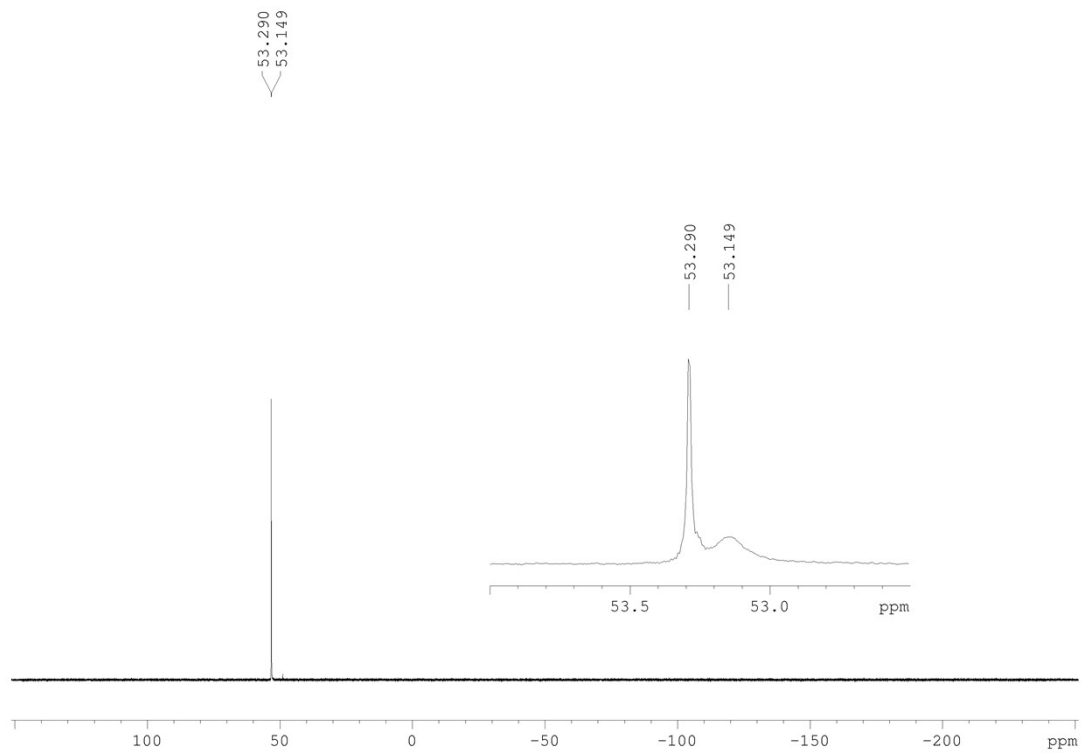

**Figure S42** <sup>31</sup>P{<sup>1</sup>H} NMR (500 MHz) of SP-13 in CD<sub>2</sub>Cl<sub>2</sub>

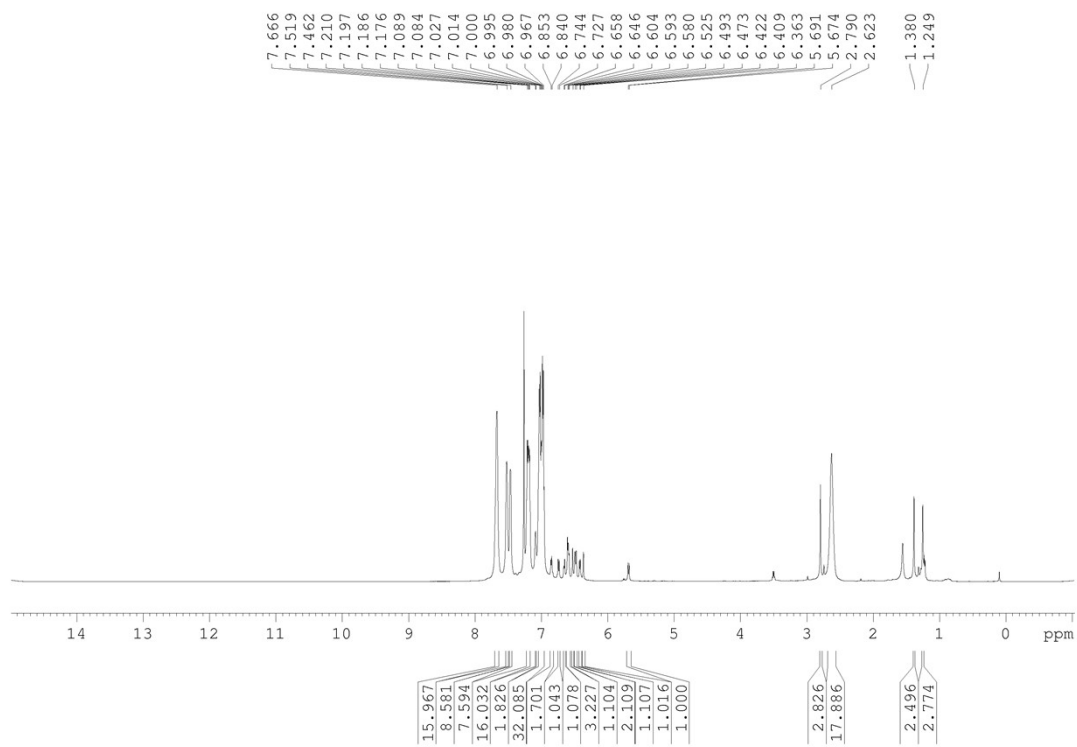

**Figure S43** <sup>1</sup>H NMR (600 MHz) of SP-16 in CDCl<sub>3</sub>

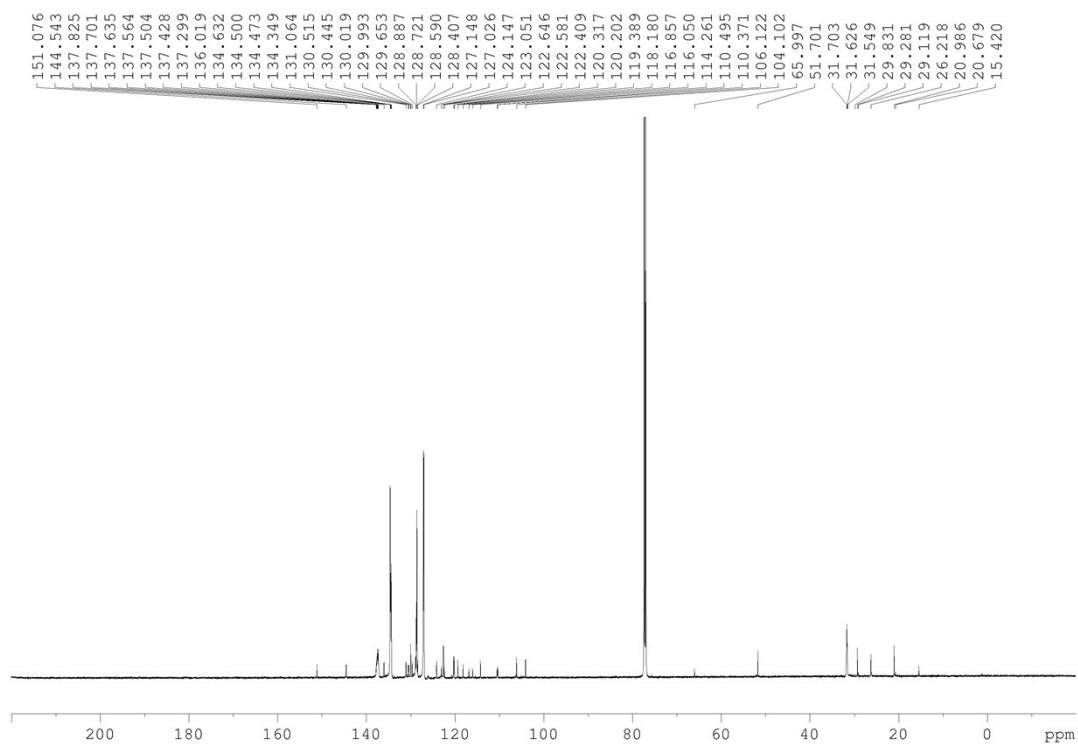

Figure S44  $^{13}\text{C}\{^1\text{H}\}$  NMR (151 MHz) of SP-16 in  $\text{CDCl}_3$

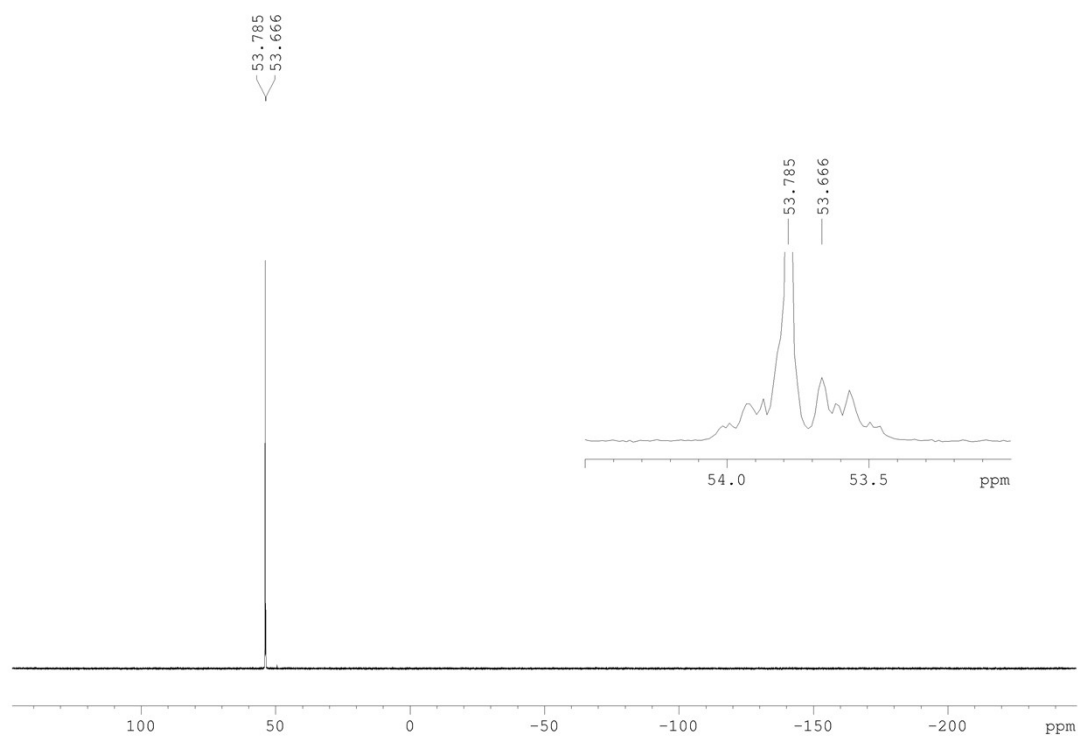

Figure S45  $^{31}\text{P}\{^1\text{H}\}$  NMR (243 MHz) of SP-16 in  $\text{CDCl}_3$

D:\transfer\_29...16NOV22\_005.raw Injection 1 FTMS + p ESI F...0000-3000.0000] MS + spectrum 0.06

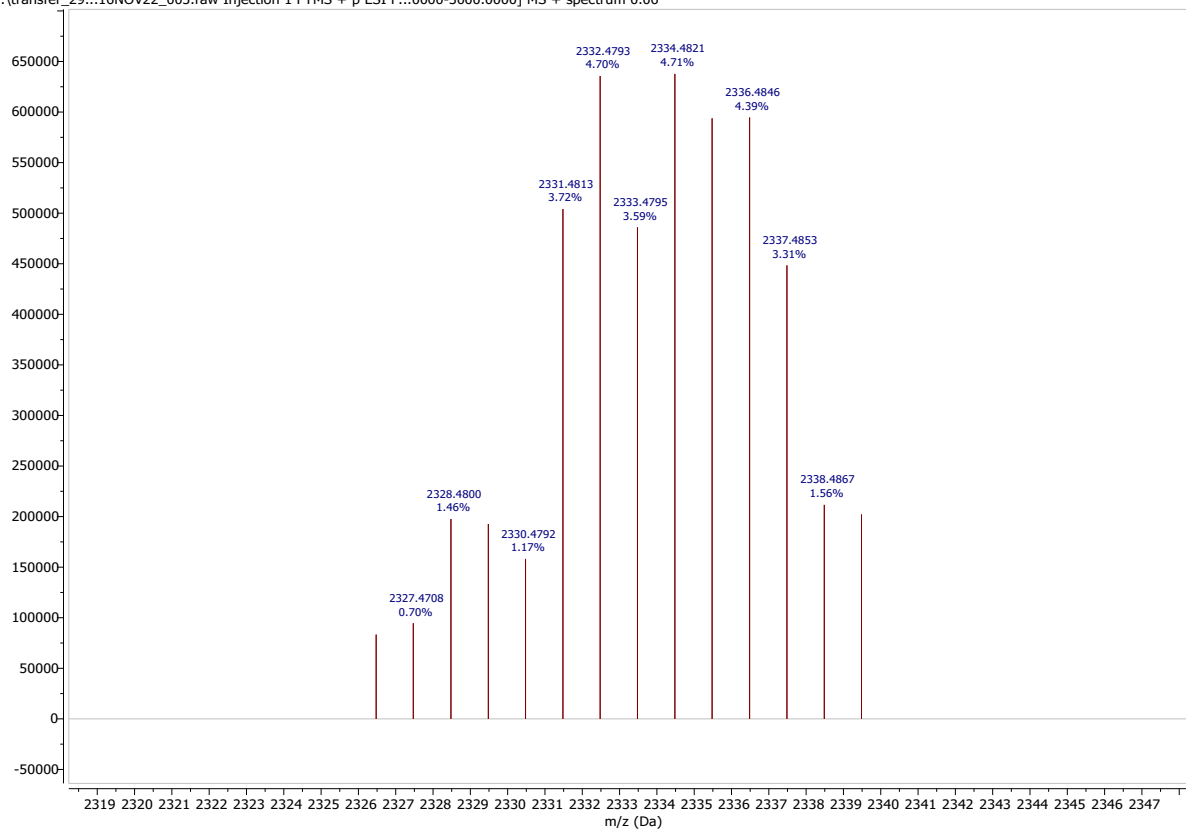

Figure S46 HRMS of SP-16.

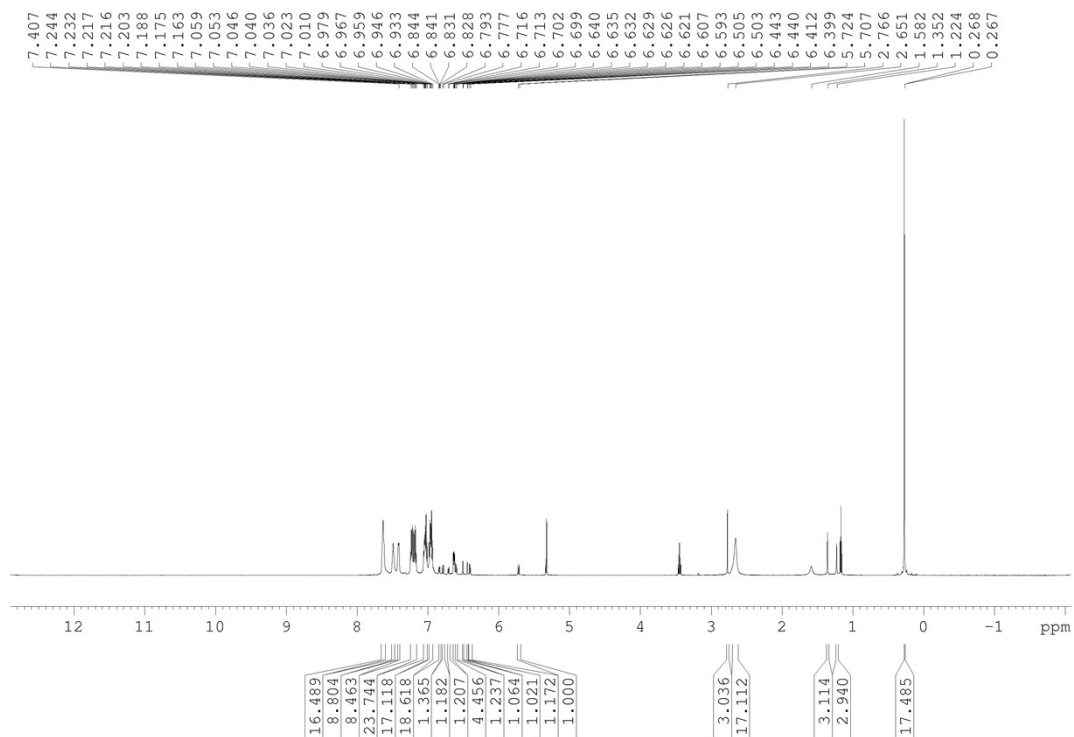

Figure S47 <sup>1</sup>H NMR (600 MHz) of SP-18 in CD<sub>2</sub>Cl<sub>2</sub>



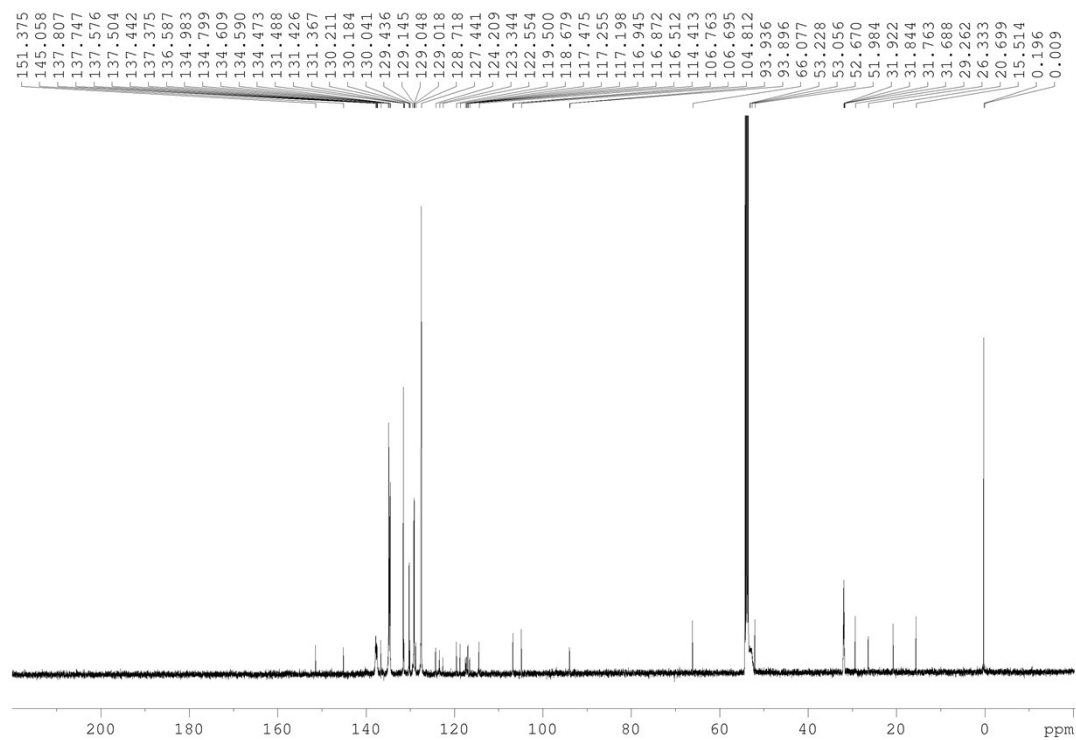

Figure S48  $^{13}\text{C}\{^1\text{H}\}$  NMR (151 MHz) of SP-18 in  $\text{CD}_2\text{Cl}_2$

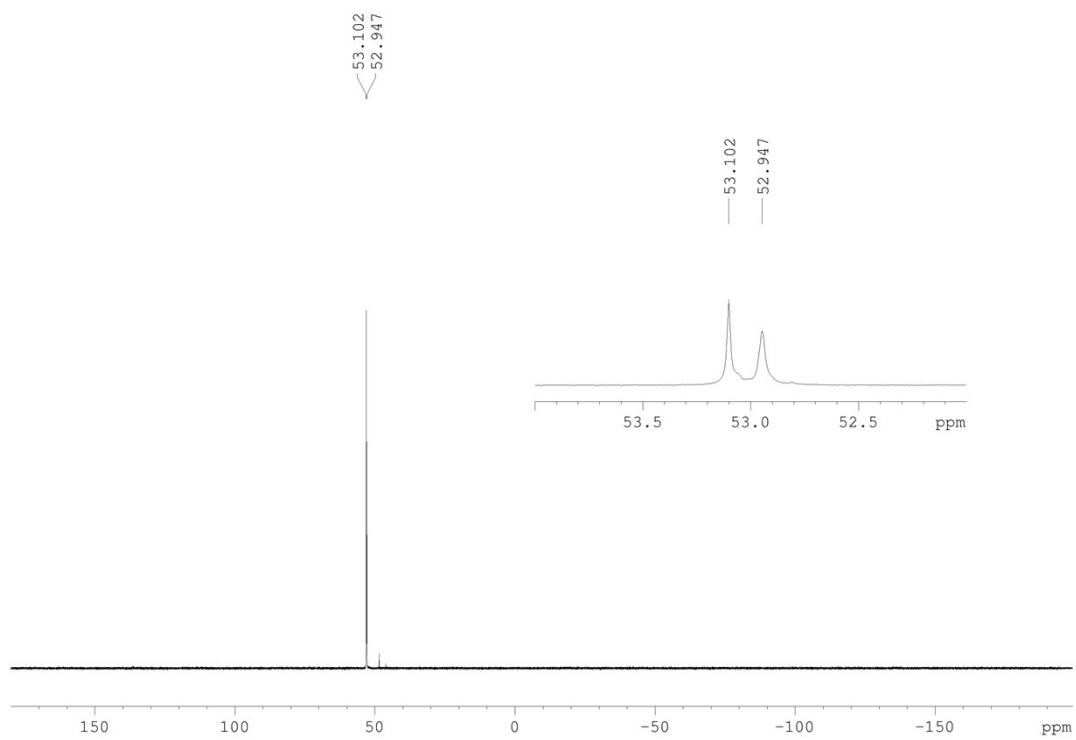

Figure S49  $^{31}\text{P}\{^1\text{H}\}$  NMR (243 MHz) of SP-18 in  $\text{CD}_2\text{Cl}_2$

D:\transfer\_29...16NOV22\_009.raw Injection 1 FTMS + p ESI F...0000-3000.0000] MS + spectrum 0.07

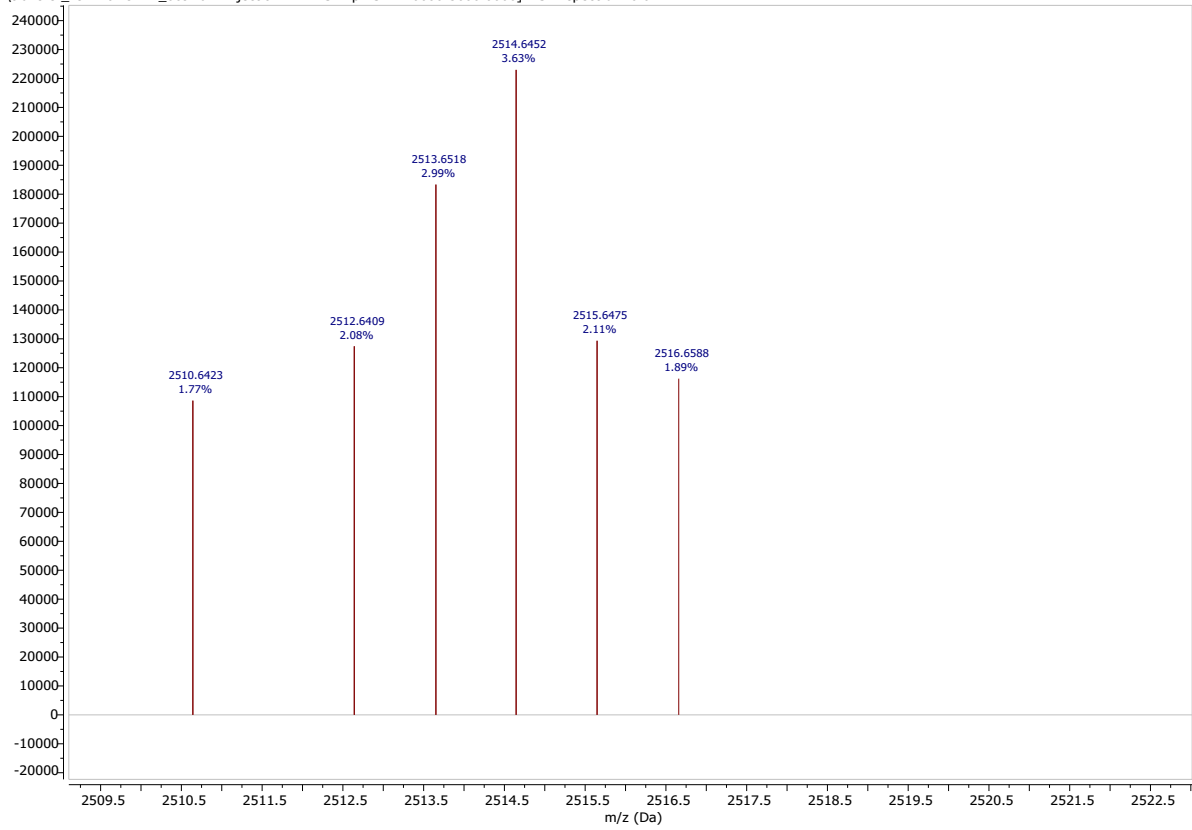

**Figure S50** HRMS of SP-18.

## DFT Calculations

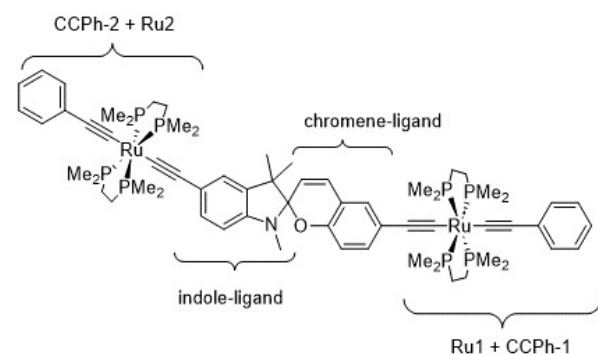

**Figure S51** Representation of SP-19 used for DFT calculations.

**Table S11.** Orbital energy (eV) and composition (%) for selected molecular orbitals of **SP-19**.

| MO  |      | eV    | CCPh-1 | dmpe-1 | dmpe-2 | Ru1 | chromene-ligand | indole-ligand | Ru2 | dmpe-3 | dmpe-4 | CCPh-2 |
|-----|------|-------|--------|--------|--------|-----|-----------------|---------------|-----|--------|--------|--------|
| 324 | L+5  | 0.89  | 99     | 0      | 0      | 0   | 0               | 0             | 0   | 0      | 0      | 0      |
| 323 | L+4  | 0.86  | 0      | 0      | 0      | 0   | 9               | 88            | 0   | 1      | 0      | 1      |
| 322 | L+3  | 0.75  | 11     | 0      | 0      | 2   | 76              | 9             | 0   | 0      | 0      | 1      |
| 321 | L+2  | 0.49  | 43     | 0      | 0      | 2   | 5               | 3             | 1   | 0      | 1      | 45     |
| 320 | L+1  | 0.48  | 41     | 0      | 0      | 2   | 7               | 4             | 1   | 0      | 1      | 44     |
| 319 | LUMO | -0.15 | 0      | 0      | 0      | 0   | 95              | 4             | 0   | 0      | 0      | 0      |
| 318 | HOMO | -4.74 | 1      | 0      | 0      | 2   | 18              | 43            | 21  | 1      | 1      | 12     |
| 317 | H-1  | -4.86 | 21     | 1      | 1      | 30  | 40              | 3             | 2   | 0      | 0      | 2      |
| 316 | H-2  | -5.17 | 0      | 0      | 0      | 0   | 16              | 7             | 51  | 2      | 2      | 22     |
| 315 | H-3  | -5.29 | 26     | 2      | 2      | 43  | 26              | 0             | 0   | 0      | 0      | 0      |
| 314 | H-4  | -5.43 | 2      | 0      | 0      | 1   | 3               | 27            | 8   | 3      | 3      | 53     |
| 313 | H-5  | -5.58 | 43     | 4      | 4      | 6   | 38              | 2             | 0   | 0      | 0      | 2      |

**Table S12.** Orbital energy (eV) and composition (%) for selected  $\alpha$ -spin orbitals of [SP-19]<sup>+</sup>

| Alpha MO |      | eV    | CCPh-1 | dmpe-1 | dmpe-2 | Ru1 | chromene-ligand | indole-ligand | Ru2 | dmpe-3 | dmpe-4 | CCPh-2 |
|----------|------|-------|--------|--------|--------|-----|-----------------|---------------|-----|--------|--------|--------|
| 329      | L+10 | 0.97  | 0      | 0      | 0      | 0   | 0               | 2             | 117 | -9     | -9     | 1      |
| 328      | L+9  | 0.93  | 0      | 0      | 0      | 0   | 0               | 1             | 111 | -5     | -5     | 0      |
| 327      | L+8  | 0.81  | 99     | 0      | 0      | 0   | 0               | 0             | 0   | 0      | 0      | 0      |
| 326      | L+7  | 0.58  | 26     | 0      | 1      | 3   | 70              | 1             | 0   | 0      | 0      | 0      |
| 325      | L+6  | 0.48  | 0      | 0      | 0      | 0   | 0               | 0             | 0   | 0      | 0      | 99     |
| 324      | L+5  | 0.38  | 70     | 0      | 0      | 3   | 26              | 0             | 0   | 0      | 0      | 0      |
| 323      | L+4  | 0.19  | 0      | 0      | 0      | 0   | 2               | 96            | 0   | 0      | 1      | 1      |
| 322      | L+3  | 0.06  | 0      | 0      | 0      | 0   | 1               | 23            | 3   | 1      | 1      | 72     |
| 321      | L+2  | 0.04  | 0      | 0      | 0      | 0   | 0               | 0             | 38  | 31     | 30     | 1      |
| 320      | L+1  | -0.17 | 0      | 0      | 0      | 0   | 4               | 69            | 3   | 0      | 0      | 23     |
| 319      | LUMO | -0.44 | 0      | 0      | 0      | 0   | 95              | 4             | 0   | 0      | 0      | 0      |
| 318      | HOMO | -4.98 | 26     | 1      | 1      | 33  | 38              | 1             | 0   | 0      | 0      | 0      |
| 317      | H-1  | -5.41 | 26     | 2      | 2      | 45  | 25              | 0             | 0   | 0      | 0      | 0      |
| 316      | H-2  | -5.7  | 40     | 4      | 4      | 4   | 37              | 9             | 1   | 0      | 0      | 1      |
| 315      | H-3  | -5.8  | 5      | 1      | 1      | 0   | 15              | 62            | 8   | 1      | 1      | 8      |
| 314      | H-4  | -6.25 | 0      | 0      | 0      | 0   | 1               | 11            | 4   | 4      | 4      | 77     |
| 313      | H-5  | -6.42 | 34     | 14     | 14     | 4   | 35              | 0             | 0   | 0      | 0      | 0      |
| 312      | H-6  | -6.5  | 0      | 0      | 0      | 0   | 17              | 7             | 38  | 1      | 1      | 35     |
| 311      | H-7  | -6.57 | 0      | 8      | 8      | 83  | 0               | 0             | 0   | 0      | 0      | 0      |
| 310      | H-8  | -6.68 | 11     | 5      | 4      | 15  | 60              | 4             | 0   | 0      | 0      | 0      |
| 309      | H-9  | -7.05 | 15     | 3      | 3      | 24  | 55              | 1             | 0   | 0      | 0      | 0      |
| 308      | H-10 | -7.17 | 0      | 0      | 0      | 0   | 16              | 12            | 4   | 19     | 19     | 29     |

**Table S13.** Orbital energy (eV) and composition (%) for selected  $\beta$ -spin orbitals of [SP-19]<sup>+</sup>

| Beta MO |      | eV    | CCPh-1 | dmpe-1 | dmpe-2 | Ru1 | chromene-ligand | indole-ligand | Ru2 | dmpe-3 | dmpe-4 | CCPh-2 |
|---------|------|-------|--------|--------|--------|-----|-----------------|---------------|-----|--------|--------|--------|
| 329     | L+11 | 0.97  | 0      | 0      | 0      | 0   | 0               | 2             | 116 | -9     | -9     | 1      |
| 328     | L+10 | 0.93  | 0      | 0      | 0      | 0   | 0               | 1             | 110 | -5     | -5     | 0      |
| 327     | L+9  | 0.81  | 99     | 0      | 0      | 0   | 0               | 0             | 0   | 0      | 0      | 0      |
| 326     | L+8  | 0.58  | 25     | 0      | 1      | 2   | 69              | 2             | 0   | 0      | 0      | 0      |
| 325     | L+7  | 0.51  | 0      | 0      | 0      | 0   | 0               | 0             | 0   | 0      | 0      | 99     |
| 324     | L+6  | 0.39  | 59     | 0      | 0      | 3   | 15              | 18            | 1   | 0      | 0      | 4      |
| 323     | L+5  | 0.35  | 10     | 0      | 0      | 1   | 11              | 71            | 1   | 0      | 1      | 5      |
| 322     | L+4  | 0.32  | 2      | 0      | 0      | 0   | 4               | 65            | 4   | 0      | 0      | 24     |
| 321     | L+3  | 0.24  | 0      | 0      | 0      | 0   | 0               | 0             | 40  | 30     | 30     | 0      |
| 320     | L+2  | -0.05 | 0      | 0      | 0      | 0   | 3               | 31            | 3   | 0      | 0      | 63     |
| 319     | L+1  | -0.43 | 0      | 0      | 0      | 0   | 96              | 4             | 0   | 0      | 0      | 0      |
| 318     | LUMO | -3.34 | 0      | 0      | 0      | 0   | 17              | 31            | 39  | 1      | 1      | 11     |
| 317     | HOMO | -4.98 | 26     | 1      | 1      | 33  | 38              | 0             | 0   | 0      | 0      | 0      |
| 316     | H-1  | -5.41 | 26     | 2      | 2      | 45  | 25              | 0             | 0   | 0      | 0      | 0      |
| 315     | H-2  | -5.7  | 38     | 4      | 4      | 4   | 34              | 8             | 2   | 0      | 0      | 6      |
| 314     | H-3  | -5.76 | 7      | 1      | 1      | 0   | 8               | 37            | 8   | 3      | 3      | 33     |
| 313     | H-4  | -6.31 | 0      | 0      | 0      | 0   | 17              | 8             | 43  | 1      | 1      | 29     |
| 312     | H-5  | -6.42 | 34     | 14     | 14     | 4   | 35              | 0             | 0   | 0      | 0      | 0      |
| 311     | H-6  | -6.57 | 0      | 8      | 8      | 83  | 0               | 0             | 0   | 0      | 0      | 0      |
| 310     | H-7  | -6.67 | 9      | 4      | 3      | 12  | 55              | 9             | 2   | 1      | 1      | 6      |
| 309     | H-8  | -6.7  | 3      | 1      | 1      | 4   | 13              | 28            | 10  | 4      | 4      | 32     |
| 308     | H-9  | -7.06 | 15     | 3      | 3      | 23  | 53              | 1             | 0   | 0      | 0      | 1      |

LUMO+2

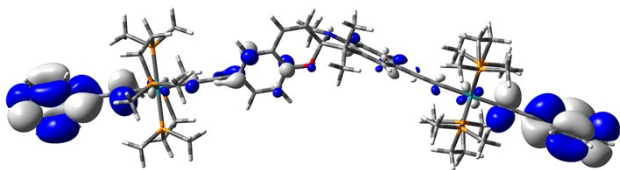

LUMO+1

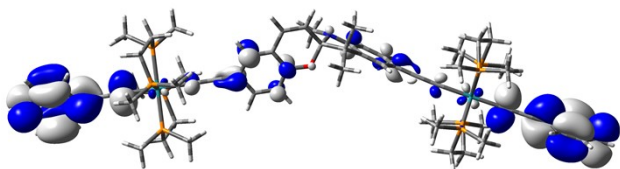

LUMO

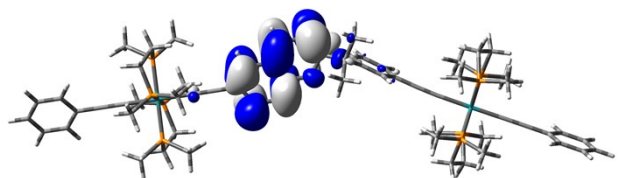

HOMO

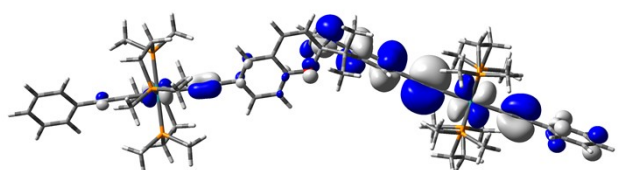

HOMO-1

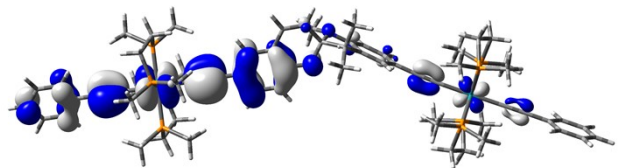

**Figure S52** Selected molecular orbitals for **SP-19**.

LUMO( $\alpha$ )+1

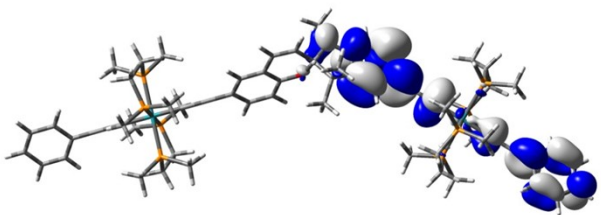

LUMO( $\beta$ )

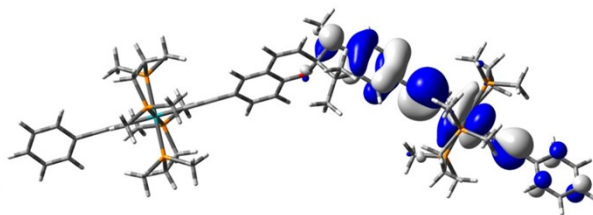

LUMO( $\alpha$ )

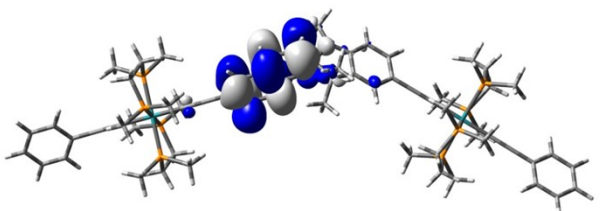

HOMO( $\beta$ )

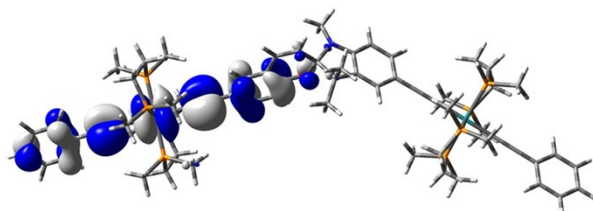

HOMO( $\alpha$ )

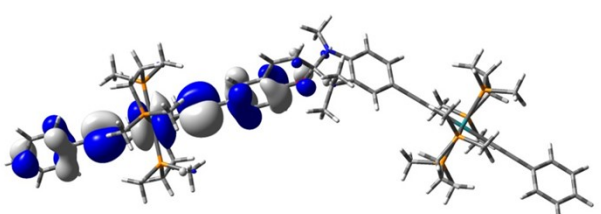

HOMO( $\beta$ )-3

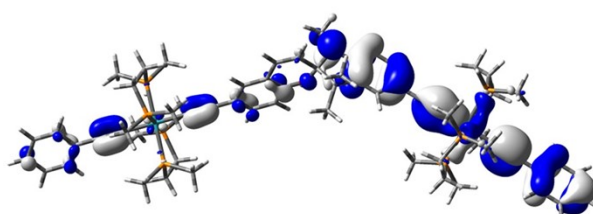

HOMO( $\alpha$ )-3

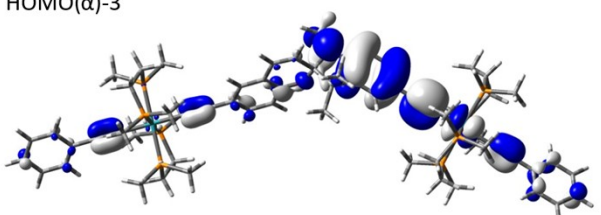

HOMO( $\beta$ )-9

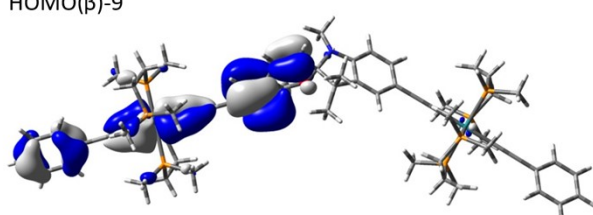

**Figure S53** Selected  $\alpha$ - and  $\beta$ -spin orbitals for  $[\text{SP-19}]^+$ .

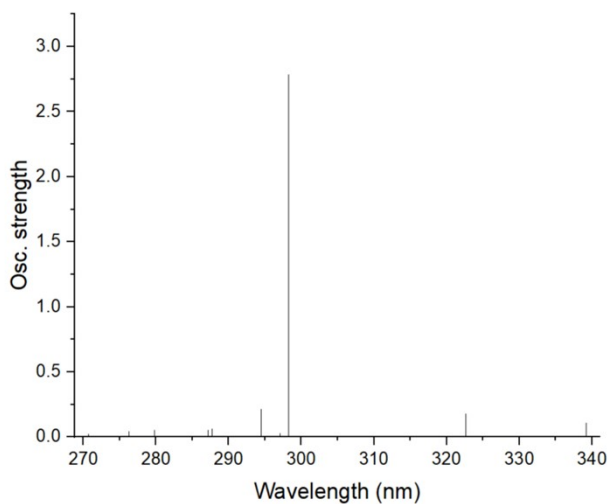

**Figure S54** Calculated UV-vis transitions (wavelength versus Oscillator strength) for **SP-19**.

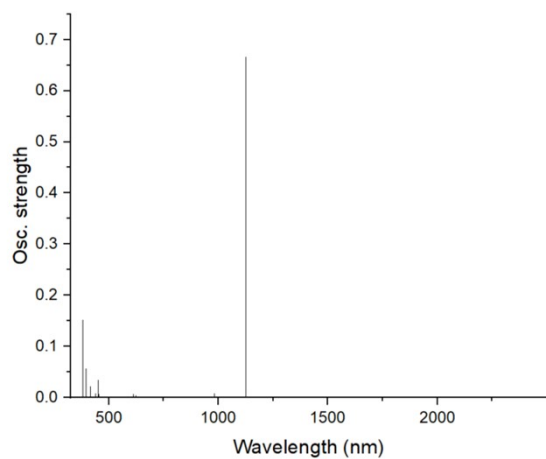

**Figure S55** Calculated UV-vis transitions (wavelength versus Oscillator strength) for **[SP-19]<sup>+</sup>**.



**Table S14** Selected major UV-vis transitions for SP-19 and [SP-19]<sup>+</sup>.

| Compound             | Energy (cm <sup>-1</sup> ) | Wavelength (nm) | Osc. Strength | Symmetry  | Major contributor                            |
|----------------------|----------------------------|-----------------|---------------|-----------|----------------------------------------------|
| SP-19                | 33525                      | 298             | 2.8           | Singlet-A | H-1->L+2 (21%), HOMO->L+1 (31%)              |
| [SP-19] <sup>+</sup> | 26220                      | 381             | 0.15          | 2.484-A   | H-3(α)->L+1(α) (16%), H-9(β)->LUMO(β) (49%)  |
| [SP-19] <sup>+</sup> | 8874                       | 1127            | 0.67          | 2.026-A   | H-3(β)->LUMO(β) (72%), H-2(β)->LUMO(β) (17%) |
